# Supplementary material for: Calibrating the tree of vipers under the fossilized birth-death model
Source: PubMed Central journal article supplement (PMC6445296; doi:10.1038/s41598-019-41290-2), 2019-04-02
Supplement: 41598_2019_41290_MOESM1_ESM.pdf [file 41598_2019_41290_MOESM1_ESM.pdf]

# Calibrating the tree of vipers under the fossilized birth-death model

Jiří Šmíd, Krystal A. Tolley

## SUPPLEMENTARY MATERIALS

### Contents:

|                                          |    |
|------------------------------------------|----|
| Supplementary Figure S1 .....            | 2  |
| Supplementary Figure S2 .....            | 3  |
| Supplementary Table S1 .....             | 4  |
| Supplementary Table S2 .....             | 12 |
| Supplementary Table S3 .....             | 13 |
| Supplementary Table S4 .....             | 33 |
| Supplementary Table S5 .....             | 34 |
| References for Supplementary Tables..... | 35 |

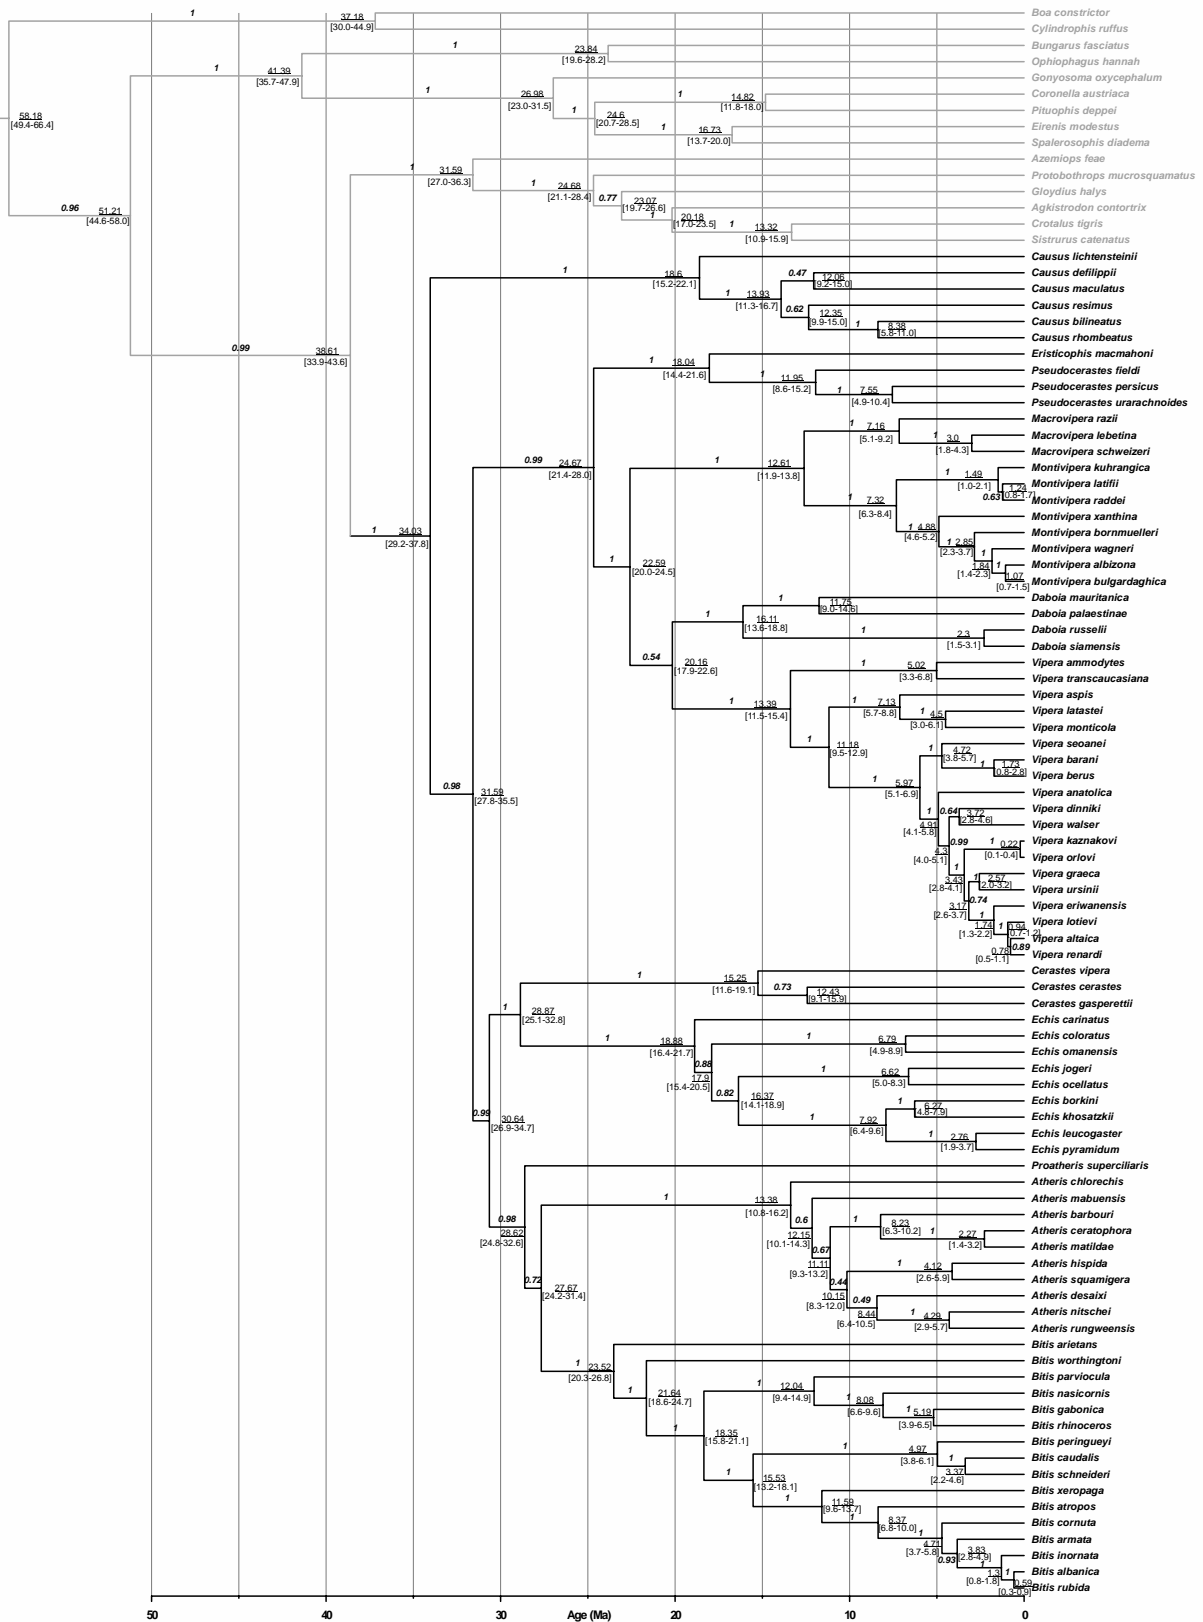

**Supplementary Figure S1.** Phylogeny of the viperines (black part of the tree) calibrated using 197 fossils of 28 species and the FBD model. The tree is a maximum clade credibility tree with mean node heights. Fossil tips have been removed from the tree because their phylogenetic placement was entirely a result of the prior. Posterior probability values are in italics and bold, mean node age estimates are underscores and their 95% HPD intervals are in brackets.



**Supplementary Table S1.** Sequences used for the phylogenetic analyses. Outgroup species marked with an asterisk in the ‘Sample’ field were used as the outgroup in the FBD analysis.

| Clade     | Genus           | Species               | Sample       | Genes | mtDNA    |          |          |          |          | nDNA     |          |          |          |          |          |          |          |
|-----------|-----------------|-----------------------|--------------|-------|----------|----------|----------|----------|----------|----------|----------|----------|----------|----------|----------|----------|----------|
|           |                 |                       |              |       | 12S      | 16S      | COI      | CYTB     | ND2      | ND4      | BDNF     | CMOS     | JUN      | NT3      | PRLR     | RAG1     | UBN1     |
| Viperinae | <i>Atheris</i>  | <i>barbouri</i>       | MTSN7311     | 3     |          | AJ275739 |          | AJ275686 |          | MF598786 |          |          |          |          |          |          |          |
| Viperinae | <i>Atheris</i>  | <i>ceratophora</i>    |              | 4     | DQ305410 | DQ305433 |          | JF825388 |          | DQ305474 |          |          |          |          |          |          |          |
| Viperinae | <i>Atheris</i>  | <i>chlorechis</i>     |              | 9     | EU624244 | EU624278 |          | AJ275679 |          | EU624211 | KX694697 | KX694773 | KX694904 | KX694995 |          | KX695062 |          |
| Viperinae | <i>Atheris</i>  | <i>desaixi</i>        |              | 2     |          | AJ275733 |          | AJ275680 |          |          |          |          |          |          |          |          |          |
| Viperinae | <i>Atheris</i>  | <i>hispidia</i>       |              | 2     |          | AJ275734 |          | AJ275681 |          |          |          |          |          |          |          |          |          |
| Viperinae | <i>Atheris</i>  | <i>mabuensis</i>      | AT822        | 2     |          |          |          | MF598824 |          | MF598799 |          |          |          |          |          |          |          |
| Viperinae | <i>Atheris</i>  | <i>matildae</i>       | MTSN7570     | 2     |          |          |          | JF825389 |          | MF598801 |          |          |          |          |          |          |          |
| Viperinae | <i>Atheris</i>  | <i>nitschei</i>       |              | 5     | AY223650 | AY223663 |          | AF471070 |          | AY223618 |          | AF471125 |          |          |          |          |          |
| Viperinae | <i>Atheris</i>  | <i>rungweensis</i>    | SHCP07-R-02  | 2     |          |          |          | MF598830 |          | MF598808 |          |          |          |          |          |          |          |
| Viperinae | <i>Atheris</i>  | <i>squamigera</i>     |              | 5     | AF544762 | EU624279 |          | EU624303 |          | EU624212 |          | AF544734 |          |          |          |          |          |
| Viperinae | <i>Bitis</i>    | <i>albatica</i>       | WW1982       | 4     |          | MK387628 |          |          | MK387427 |          |          |          |          |          | MK387568 |          | MK387492 |
| Viperinae | <i>Bitis</i>    | <i>arietans</i>       | 1202         | 11    | KX694571 | MK387629 | EU852310 | JX114014 | MK387428 | JX114185 |          |          | KX694906 | KX694996 | JX073299 | KX695063 | MK387493 |
| Viperinae | <i>Bitis</i>    | <i>armata</i>         | 1729         | 4     |          | MK387636 |          |          | JX073291 |          |          |          |          |          | JX073302 |          | MK387503 |
| Viperinae | <i>Bitis</i>    | <i>atropos</i>        | 1445         | 7     | EU624246 | EU624281 |          | AJ275691 | JX073287 | EU624214 |          |          |          |          | JX073298 |          | MK387507 |
| Viperinae | <i>Bitis</i>    | <i>caudalis</i>       | 1752         | 7     | EU624247 | EU624282 |          | AJ275693 | JX073293 | EU624215 |          |          |          |          | JX073304 |          | MK387513 |
| Viperinae | <i>Bitis</i>    | <i>cornuta</i>        | 1379         | 7     | EU624248 | EU624283 |          | EU624305 | MK387450 | EU624216 |          |          |          |          | MK387590 |          | MK387520 |
| Viperinae | <i>Bitis</i>    | <i>gabonica</i>       | 1873         | 13    | EU624249 | EU624284 | KX012772 | AJ275695 | JX073296 | EU624217 | KX694698 | KX694822 | KX694907 | KX694997 | JX073307 | KX695064 | MK387523 |
| Viperinae | <i>Bitis</i>    | <i>inornata</i>       | Bit10, 13042 | 5     |          | MK387660 |          |          | MK387457 | MK410937 |          |          |          |          | MK387596 |          | MK387528 |
| Viperinae | <i>Bitis</i>    | <i>nasicornis</i>     | 1241         | 9     | DQ305411 | AY188048 | KX012786 | AY188009 | MK387458 | DQ305475 |          | AF471130 |          |          | MK387597 |          | MK387529 |
| Viperinae | <i>Bitis</i>    | <i>parviocula</i>     | 2980         | 4     |          | MK387665 |          |          | JX073292 |          |          |          |          |          | JX073303 |          | MK387533 |
| Viperinae | <i>Bitis</i>    | <i>peringueyi</i>     | 2817         | 7     | DQ305412 | DQ305435 |          | DQ305458 | MK387464 | DQ305476 |          |          |          |          | MK387603 |          | MK387536 |
| Viperinae | <i>Bitis</i>    | <i>rhinoceros</i>     | 1287         | 7     | EU624250 | EU624285 |          | AJ275696 | MK387466 | EU624218 |          |          |          |          | MK387605 |          | MK387538 |
| Viperinae | <i>Bitis</i>    | <i>rubida</i>         | 1397         | 7     | EU624251 | EU624286 |          | EU624306 | JX073290 | EU624219 |          |          |          |          | JX073301 |          | MK387540 |
| Viperinae | <i>Bitis</i>    | <i>schneideri</i>     | 2811         | 4     |          | MK387675 |          |          | JX073297 |          |          |          |          |          | JX073308 |          | MK387545 |
| Viperinae | <i>Bitis</i>    | <i>worthingtoni</i>   | 1369         | 7     | EU624252 | AJ275745 |          | AJ275692 | JX073295 | EU624220 |          |          |          |          | JX073306 |          | MK387548 |
| Viperinae | <i>Bitis</i>    | <i>xeropaga</i>       | 1556         | 7     | EU624253 | EU624287 |          | EU624307 | JX073294 | EU624221 |          |          |          |          | JX073305 |          | MK387552 |
| Viperinae | <i>Causus</i>   | <i>cf. bilineatus</i> | Eli_216      | 2     |          | MK410884 |          |          | MK410887 |          |          |          |          |          |          |          |          |
| Viperinae | <i>Causus</i>   | <i>defilippii</i>     | MBUR_00840   | 11    | GU045452 | GU045452 | GU045452 | GU045452 | GU045452 | GU045452 | EU402633 | MK410890 |          | EU390913 | JN880816 |          | JN614053 |
| Viperinae | <i>Causus</i>   | <i>lichtensteinii</i> | Eli_3099     | 8     | KX694560 | MK410885 |          |          | MK410888 |          | KX694705 | MK410891 | KX694916 | KX695002 |          | KX695072 |          |
| Viperinae | <i>Causus</i>   | <i>maculatus</i>      | Eli_2122     | 3     |          | MK410886 |          |          | MK410889 |          |          | MK410892 |          |          |          |          |          |
| Viperinae | <i>Causus</i>   | <i>resimus</i>        |              | 5     | AY223649 | AY223662 |          | AY223555 |          | AY223616 |          | AF544696 |          |          |          |          |          |
| Viperinae | <i>Causus</i>   | <i>rhombeatus</i>     | WC_2691      | 5     | DQ305409 | DQ305432 |          | DQ305455 |          | U41866   |          | MK410893 |          |          |          |          |          |
| Viperinae | <i>Cerastes</i> | <i>cerastes</i>       |              | 12    | EU852317 | EU852323 | EU852311 | AF471028 |          | EU624222 | KX694706 | AF544679 | KX694917 | KX695003 | HM623449 | EU852329 | HM623455 |
| Viperinae | <i>Cerastes</i> | <i>gasperettii</i>    |              | 3     | HQ658423 | HQ267799 |          | AJ275704 |          |          |          |          |          |          |          |          |          |
| Viperinae | <i>Cerastes</i> | <i>vipera</i>         |              | 2     |          | AJ275757 |          | AJ275705 |          |          |          |          |          |          |          |          |          |
| Viperinae | <i>Daboia</i>   | <i>mauritanica</i>    |              | 4     | EU624261 | EU624295 |          | KJ415304 |          | EU624229 |          |          |          |          |          |          |          |

| Clade     | Genus                 | Species              | Sample | Genes | mtDNA    |          |          |          |          |          | nDNA     |          |          |          |          |          |          |
|-----------|-----------------------|----------------------|--------|-------|----------|----------|----------|----------|----------|----------|----------|----------|----------|----------|----------|----------|----------|
|           |                       |                      |        |       | 12S      | 16S      | COI      | CYTB     | ND2      | ND4      | BDNF     | CMOS     | JUN      | NT3      | PRLR     | RAG1     | UBN1     |
| Viperinae | <i>Daboia</i>         | <i>palaestinae</i>   |        | 3     | JN870183 | AJ275775 |          | AJ275722 |          |          |          |          |          |          |          |          |          |
| Viperinae | <i>Daboia</i>         | <i>russelii</i>      |        | 10    | EU913478 | EU913478 | EU913478 | EU913478 | EU913478 | EU913478 |          |          | GQ225671 | EU390916 | JN880826 |          | JN614055 |
| Viperinae | <i>Daboia</i>         | <i>siamensis</i>     |        | 5     |          |          | AB920195 | AB920249 |          |          |          | EU402636 | AF471156 |          |          |          | EU402843 |
| Viperinae | <i>Echis</i>          | <i>borkini</i>       |        | 4     | GQ359644 | GQ359734 |          | GQ359485 |          | GQ359569 |          |          |          |          |          |          |          |
| Viperinae | <i>Echis</i>          | <i>carinatus</i>     |        | 8     | EU852313 | EU852319 | EU852307 | GQ359433 |          | GQ359521 |          |          |          |          | HM623447 | EU852325 | HM623453 |
| Viperinae | <i>Echis</i>          | <i>coloratus</i>     |        | 8     | EU852315 | HQ658452 | EU852309 | EU852297 |          | EU852303 |          |          |          |          | HM623444 | EU852327 | HM623450 |
| Viperinae | <i>Echis</i>          | <i>jogeri</i>        |        | 4     | GQ359641 | GQ359725 |          | GQ359476 |          | GQ359567 |          |          |          |          |          |          |          |
| Viperinae | <i>Echis</i>          | <i>khosatzkii</i>    |        | 4     | GQ359617 | GQ359698 |          | GQ359449 |          | GQ359534 |          |          |          |          |          |          |          |
| Viperinae | <i>Echis</i>          | <i>leucogaster</i>   |        | 4     | GQ359621 | GQ359704 |          | GQ359455 |          | GQ359540 |          |          |          |          |          |          |          |
| Viperinae | <i>Echis</i>          | <i>ocellatus</i>     |        | 8     | EU852312 | GQ359731 | EU852306 | GQ359418 |          | AF292607 |          |          |          |          | HM623446 | EU852324 | HM623452 |
| Viperinae | <i>Echis</i>          | <i>omanensis</i>     |        | 4     | GQ359631 | GQ359723 |          | GQ359466 |          | GQ359550 |          |          |          |          |          |          |          |
| Viperinae | <i>Echis</i>          | <i>pyramidum</i>     |        | 8     | EU852314 | EU852320 | EU852308 | EU852296 |          | EU852302 |          |          |          |          | HM623445 | EU852326 | HM623451 |
| Viperinae | <i>Eristicophis</i>   | <i>macmahoni</i>     |        | 4     | EU624259 | EU624293 |          | HM179464 |          | EU624227 |          |          |          |          |          |          |          |
| Viperinae | <i>Macrovipera</i>    | <i>lebetina</i>      |        | 9     | EU624260 | EU624294 |          | KJ415300 |          | DQ897729 | KX694736 | KX694785 | KX694942 | KX695028 |          |          | KX695096 |
| Viperinae | <i>Macrovipera</i>    | <i>razii</i>         |        | 1     |          |          |          | MF445994 |          |          |          |          |          |          |          |          |          |
| Viperinae | <i>Macrovipera</i>    | <i>schweizeri</i>    |        | 3     | EU624262 | AJ275768 |          | AJ275715 |          |          |          |          |          |          |          |          |          |
| Viperinae | <i>Montivipera</i>    | <i>albizona</i>      |        | 6     | EU624265 | AJ275780 | KX168823 | KX168722 |          | EU624231 |          |          |          |          |          |          | KX169130 |
| Viperinae | <i>Montivipera</i>    | <i>bornmuelleri</i>  |        | 4     |          | AJ275779 | KX168831 | KX168730 |          |          |          |          |          |          |          |          | KX169134 |
| Viperinae | <i>Montivipera</i>    | <i>bulgardaghica</i> |        | 4     |          | AJ275783 | KX168839 | KX168738 |          |          |          |          |          |          |          |          | KX169138 |
| Viperinae | <i>Montivipera</i>    | <i>kuhrangica</i>    |        | 1     |          |          | KJ950754 |          |          |          |          |          |          |          |          |          |          |
| Viperinae | <i>Montivipera</i>    | <i>latifii</i>       |        | 5     | JN870191 | JN870199 | KX168843 | KX168742 |          |          |          |          |          |          |          |          | KX169139 |
| Viperinae | <i>Montivipera</i>    | <i>raddei</i>        |        | 9     | KX694554 | AJ275784 | KX168856 | KX168755 |          |          | KX694739 | KX694787 | KX694945 | KX695031 |          |          | KX169144 |
| Viperinae | <i>Montivipera</i>    | <i>wagneri</i>       |        | 6     | JN870188 | AJ275778 | KX168872 | KX168770 |          | JN870213 |          |          |          |          |          |          | KX169145 |
| Viperinae | <i>Montivipera</i>    | <i>xanthina</i>      |        | 6     | EU624268 | AJ275777 | KX168908 | KX168806 |          | EU624234 |          |          |          |          |          |          | KX169155 |
| Viperinae | <i>Proatheris</i>     | <i>superciliaris</i> |        | 4     | EU624263 | EU624296 |          | AJ275685 |          | EU624230 |          |          |          |          |          |          |          |
| Viperinae | <i>Pseudocerastes</i> | <i>fieldi</i>        |        | 2     | EU624264 |          |          | AJ275716 |          |          |          |          |          |          |          |          |          |
| Viperinae | <i>Pseudocerastes</i> | <i>persicus</i>      |        | 2     |          | AJ275769 |          | AJ275717 |          |          |          |          |          |          |          |          |          |
| Viperinae | <i>Pseudocerastes</i> | <i>urarachnoides</i> |        | 1     |          |          |          | KF314714 |          |          |          |          |          |          |          |          |          |
| Viperinae | <i>Vipera</i>         | <i>altaica</i>       |        | 2     |          |          | KC122717 | KC176729 |          |          |          |          |          |          |          |          |          |
| Viperinae | <i>Vipera</i>         | <i>ammodytes</i>     |        | 7     | L01768   | EU624297 | KU986335 | DQ186508 | AY321072 | EU624232 |          |          |          |          |          |          | KX357729 |
| Viperinae | <i>Vipera</i>         | <i>anatolica</i>     |        | 2     |          |          | KC122762 | KC316113 |          |          |          |          |          |          |          |          |          |
| Viperinae | <i>Vipera</i>         | <i>aspis</i>         |        | 6     | JN870190 |          | KP697881 | KR153577 | AY321085 | JX649606 |          |          |          |          |          |          | KX357730 |
| Viperinae | <i>Vipera</i>         | <i>barani</i>        |        | 1     |          |          |          | AY321092 |          |          |          |          |          |          |          |          |          |
| Viperinae | <i>Vipera</i>         | <i>berus</i>         |        | 12    | EU543221 | KJ128962 | KC122718 | DQ186031 | AY321075 | FR727036 | LT220962 | KX694795 | KX694975 | LT220980 | LT221007 |          | KX357727 |
| Viperinae | <i>Vipera</i>         | <i>dimmiki</i>       |        | 3     |          | AJ275773 | KC122719 | KC176731 |          |          |          |          |          |          |          |          |          |
| Viperinae | <i>Vipera</i>         | <i>erivanensis</i>   |        | 9     | KX694555 | KX694672 | KC122722 | FR727090 |          | FR727021 | KX694770 | KX694794 | KX694974 | KX695056 |          |          |          |
| Viperinae | <i>Vipera</i>         | <i>graeca</i>        |        | 5     |          |          |          | LT220960 |          | LN835177 | LT220966 |          |          | LT220984 | LT221011 |          |          |
| Viperinae | <i>Vipera</i>         | <i>kaznakovi</i>     |        | 3     |          |          | KC122724 | KC176736 |          | FR727034 |          |          |          |          |          |          |          |

| Clade           | Genus                | Species                | Sample | Genes | mtDNA     |           |           |           |           |           | nDNA     |          |          |          |          |          |          |
|-----------------|----------------------|------------------------|--------|-------|-----------|-----------|-----------|-----------|-----------|-----------|----------|----------|----------|----------|----------|----------|----------|
|                 |                      |                        |        |       | 12S       | 16S       | COI       | CYTB      | ND2       | ND4       | BDNF     | CMOS     | JUN      | NT3      | PRLR     | RAG1     | UBN1     |
| Viperinae       | <i>Vipera</i>        | <i>latastei</i>        |        | 3     |           |           |           | AY321094  | AY321074  | JX649540  |          |          |          |          |          |          |          |
| Viperinae       | <i>Vipera</i>        | <i>lotievi</i>         |        | 3     |           |           | KC122728  | FR727097  |           | FR727030  |          |          |          |          |          |          |          |
| Viperinae       | <i>Vipera</i>        | <i>monticola</i>       |        | 1     |           |           |           |           |           | KJ415298  |          |          |          |          |          |          |          |
| Viperinae       | <i>Vipera</i>        | <i>orlovi</i>          |        | 2     |           |           | KC122734  | KC176746  |           |           |          |          |          |          |          |          |          |
| Viperinae       | <i>Vipera</i>        | <i>renardi</i>         |        | 6     |           |           | KC122716  | FR745991  |           | FR727033  | LT220977 |          | LT220995 | LT221022 |          |          |          |
| Viperinae       | <i>Vipera</i>        | <i>seoanei</i>         |        | 5     |           | AJ275782  | KC122736  | DQ186030  | AY321071  | FR727035  |          |          |          |          |          |          |          |
| Viperinae       | <i>Vipera</i>        | <i>transcaucasiana</i> |        | 2     |           |           |           | DQ186478  |           |           |          |          |          |          |          |          |          |
| Viperinae       | <i>Vipera</i>        | <i>ursinii</i>         |        | 9     | EF012817  |           | KC122737  | KC176749  | AY321069  | FR726956  | LT220979 | AF433658 | LT220997 | LT221009 |          |          |          |
| Viperinae       | <i>Vipera</i>        | <i>walser</i>          |        | 4     |           | KX357758  |           | KX357741  |           | KX357731  |          |          |          |          |          |          | KX357728 |
| <b>outgroup</b> |                      |                        |        |       |           |           |           |           |           |           |          |          |          |          |          |          |          |
| Azemiopinae     | <i>Azemiops</i>      | <i>feae</i>            | *      | 10    | AF512748  | AF512748  |           | KF997880  |           | U41865    | EU402628 | KX694774 | KX694905 | KX694977 |          | EU402836 | JN614048 |
| Crotalinae      | <i>Agkistrodon</i>   | <i>bilineatus</i>      |        | 4     | AF156591  | AF057277  |           | EU483408  |           | AF156583  |          |          |          |          |          |          |          |
| Crotalinae      | <i>Agkistrodon</i>   | <i>contortrix</i>      | *      | 10    | AF259224  | AF259117  | KU985795  | EU483255  |           | U41868    | EU402623 |          |          | JN703027 | JN880801 | EU402833 | JN614044 |
| Crotalinae      | <i>Agkistrodon</i>   | <i>howardgloydi</i>    |        | 3     | AF156592  | AF156571  |           |           |           | AF156584  |          |          |          |          |          |          |          |
| Crotalinae      | <i>Agkistrodon</i>   | <i>piscivorus</i>      |        | 11    | NC_009768 | NC_009768 | NC_009768 | NC_009768 | NC_009768 | NC_009768 | KX694693 | KX694772 | KX694900 | KX694976 |          | KX695059 |          |
| Crotalinae      | <i>Agkistrodon</i>   | <i>russeolus</i>       |        | 2     |           | AF156573  |           |           |           | AF156586  |          |          |          |          |          |          |          |
| Crotalinae      | <i>Agkistrodon</i>   | <i>taylori</i>         |        | 4     | AF156589  | AF156568  |           | EU483477  |           | AF156580  |          |          |          |          |          |          |          |
| Crotalinae      | <i>Atropoides</i>    | <i>indomitus</i>       |        | 1     |           |           |           |           |           | KC354700  |          |          |          |          |          |          |          |
| Crotalinae      | <i>Atropoides</i>    | <i>mexicanus</i>       |        | 4     | KC847268  | KC847255  |           | KC847271  |           | KC847289  |          |          |          |          |          |          |          |
| Crotalinae      | <i>Atropoides</i>    | <i>nummifer</i>        |        | 5     | DQ305422  | AF057254  |           | AY220314  |           | AY220329  |          |          |          |          |          | KU234642 |          |
| Crotalinae      | <i>Atropoides</i>    | <i>occiduus</i>        |        | 4     | DQ305423  | DQ305446  |           | DQ061194  |           | DQ061219  |          |          |          |          |          |          |          |
| Crotalinae      | <i>Atropoides</i>    | <i>olmec</i>           |        | 4     | AY223656  | AY223669  |           | AY223585  |           | AY223632  |          |          |          |          |          |          |          |
| Crotalinae      | <i>Atropoides</i>    | <i>picadoi</i>         |        | 4     | AF057208  | AF057255  |           | AY223583  |           | U41872    |          |          |          |          |          |          |          |
| Crotalinae      | <i>Bothriechis</i>   | <i>aurifer</i>         |        | 5     | DQ305425  | DQ305448  |           | DQ305466  |           | DQ305483  |          |          |          |          |          | KU234643 |          |
| Crotalinae      | <i>Bothriechis</i>   | <i>bicolor</i>         |        | 5     | DQ305426  | DQ305449  |           | DQ305467  |           | DQ305484  |          |          |          |          |          | KU234644 |          |
| Crotalinae      | <i>Bothriechis</i>   | <i>guifarroi</i>       |        | 5     | KC847267  | KC847262  |           | KC847275  |           | KC847286  |          |          |          |          |          | KU234640 |          |
| Crotalinae      | <i>Bothriechis</i>   | <i>lateralis</i>       |        | 6     | AF057211  | AF057258  | KU986328  | AY223588  |           | U41873    |          |          |          |          |          | KU234645 |          |
| Crotalinae      | <i>Bothriechis</i>   | <i>marchi</i>          |        | 5     | DQ305428  | DQ305451  |           | DQ305469  |           | DQ305486  |          |          |          |          |          | KU234646 |          |
| Crotalinae      | <i>Bothriechis</i>   | <i>nigroviridis</i>    |        | 5     | AF057212  | AF057259  |           | AY223589  |           | AY223635  |          |          |          |          |          | KU234627 |          |
| Crotalinae      | <i>Bothriechis</i>   | <i>nubestris</i>       |        | 4     |           | KU176473  |           | KU203347  |           | KU215602  |          |          |          |          |          | KU234634 |          |
| Crotalinae      | <i>Bothriechis</i>   | <i>rowleyi</i>         |        | 5     | DQ305427  | DQ305450  |           | DQ305468  |           | DQ305485  |          |          |          |          |          | KU234647 |          |
| Crotalinae      | <i>Bothriechis</i>   | <i>schlegelii</i>      |        | 7     | AF057213  | KC847256  | KU986324  | AY223590  |           | U41874    | FJ433983 |          |          |          |          | KU234648 |          |
| Crotalinae      | <i>Bothriechis</i>   | <i>supraciliaris</i>   |        | 5     | DQ305429  | DQ305452  |           | DQ305470  |           | DQ305487  |          |          |          |          |          | KU234649 |          |
| Crotalinae      | <i>Bothriechis</i>   | <i>thalassinus</i>     |        | 5     | DQ305424  | DQ305447  |           | DQ305465  |           | DQ305482  |          |          |          |          |          | KU234650 |          |
| Crotalinae      | <i>Bothrocophias</i> | <i>campbelli</i>       |        | 2     |           |           |           | AF191582  |           | AF292622  |          |          |          |          |          |          |          |
| Crotalinae      | <i>Bothrocophias</i> | <i>hyoprora</i>        |        | 4     | AF057206  | AF057253  |           | AY223593  |           | U41886    |          |          |          |          |          |          |          |
| Crotalinae      | <i>Bothrocophias</i> | <i>microphthalmus</i>  |        | 4     | AY223657  | AY223670  |           | FR691565  |           | FR691538  |          |          |          |          |          |          |          |
| Crotalinae      | <i>Bothrops</i>      | <i>alcatraz</i>        |        | 1     |           |           |           | AY865820  |           |           |          |          |          |          |          |          |          |
| Crotalinae      | <i>Bothrops</i>      | <i>alternatus</i>      |        | 4     | AY027777  | AY223673  |           | EU867273  |           | AF292617  |          |          |          |          |          |          |          |

| Clade      | Genus               | Species               | Sample | Genes | mtDNA    |          |          |          |     |          | nDNA     |          |          |          |      |          |          |
|------------|---------------------|-----------------------|--------|-------|----------|----------|----------|----------|-----|----------|----------|----------|----------|----------|------|----------|----------|
|            |                     |                       |        |       | 12S      | 16S      | COI      | CYTB     | ND2 | ND4      | BDNF     | CMOS     | JUN      | NT3      | PRLR | RAG1     | UBN1     |
| Crotalinae | <i>Bothrops</i>     | <i>ammodytoides</i>   |        | 4     | AY046572 | AY223671 |          | AY223595 |     | AY223639 |          |          |          |          |      |          |          |
| Crotalinae | <i>Bothrops</i>     | <i>asper</i>          |        | 9     | AF057218 | AF057265 | KU986307 | HE867043 |     | U41876   | EU402630 |          |          | EU390910 |      | EU402838 | JN614050 |
| Crotalinae | <i>Bothrops</i>     | <i>atrox</i>          |        | 10    | AY223659 | AY223672 | KU986342 | GQ428476 |     | AY223641 | KX694699 | KX694802 | KX694908 | KX694978 |      | DQ469790 |          |
| Crotalinae | <i>Bothrops</i>     | <i>barnetti</i>       |        | 1     |          |          | KU986339 |          |     |          |          |          |          |          |      |          |          |
| Crotalinae | <i>Bothrops</i>     | <i>bilineatus</i>     |        | 4     | AF057214 | AF057261 |          | AY223591 |     | U41875   |          |          |          |          |      |          |          |
| Crotalinae | <i>Bothrops</i>     | <i>brazili</i>        |        | 7     | EU867252 | EU867264 | KU986320 | EU867276 |     | AF292635 |          | KX694775 |          |          |      | KX695066 |          |
| Crotalinae | <i>Bothrops</i>     | <i>caribbaeus</i>     |        | 2     |          |          |          | AF292598 |     | AF292636 |          |          |          |          |      |          |          |
| Crotalinae | <i>Bothrops</i>     | <i>chloromelas</i>    |        | 4     | DQ305430 | DQ305453 |          | DQ305471 |     | DQ305488 |          |          |          |          |      |          |          |
| Crotalinae | <i>Bothrops</i>     | <i>cotiara</i>        |        | 4     | AF057217 | AF057264 |          | AY223597 |     | AF292619 |          |          |          |          |      |          |          |
| Crotalinae | <i>Bothrops</i>     | <i>diporus</i>        |        | 4     | DQ305431 | DQ305454 |          | KF801111 |     | AF292625 |          |          |          |          |      |          |          |
| Crotalinae | <i>Bothrops</i>     | <i>erythromelas</i>   |        | 4     | AF057219 | AF057266 |          | AY223600 |     | KF801255 |          |          |          |          |      |          |          |
| Crotalinae | <i>Bothrops</i>     | <i>fonsecai</i>       |        | 7     | KX694552 | KX694621 |          | AF292580 |     | AF292618 |          | KX694803 | KX694909 |          |      | KX695067 |          |
| Crotalinae | <i>Bothrops</i>     | <i>insularis</i>      |        | 4     | AF057216 | AF057263 |          | AY223596 |     | AF188705 |          |          |          |          |      |          |          |
| Crotalinae | <i>Bothrops</i>     | <i>itapetingae</i>    |        | 4     | EU867253 | EU867265 |          | AF292582 |     | AF292620 |          |          |          |          |      |          |          |
| Crotalinae | <i>Bothrops</i>     | <i>jararaca</i>       |        | 5     | EU867254 | EU867266 |          | AF292589 |     | AF292627 |          |          |          | KX694979 |      |          |          |
| Crotalinae | <i>Bothrops</i>     | <i>jararacussu</i>    |        | 8     | AY223661 | AY223674 |          | AY223602 |     | AF292634 |          | KX694776 | KX694910 | KX694980 |      | KX695068 |          |
| Crotalinae | <i>Bothrops</i>     | <i>lanceolatus</i>    |        | 2     |          |          |          | AF292599 |     | AF292637 |          |          |          |          |      |          |          |
| Crotalinae | <i>Bothrops</i>     | <i>leucurus</i>       |        | 5     | EU867255 | EU867267 | KU986310 | EU867279 |     | AF246279 |          |          |          |          |      |          |          |
| Crotalinae | <i>Bothrops</i>     | <i>lojanus</i>        |        | 2     |          |          |          | FR691566 |     | FR691536 |          |          |          |          |      |          |          |
| Crotalinae | <i>Bothrops</i>     | <i>lutzi</i>          |        | 2     |          |          |          | KF801130 |     | KF801261 |          |          |          |          |      |          |          |
| Crotalinae | <i>Bothrops</i>     | <i>marajoensis</i>    |        | 2     |          |          |          | AF292605 |     | AF292643 |          |          |          |          |      |          |          |
| Crotalinae | <i>Bothrops</i>     | <i>marmoratus</i>     |        | 2     |          |          |          | KF801137 |     | KF801265 |          |          |          |          |      |          |          |
| Crotalinae | <i>Bothrops</i>     | <i>matogrossensis</i> |        | 2     |          |          |          | KF801148 |     | KF801276 |          |          |          |          |      |          |          |
| Crotalinae | <i>Bothrops</i>     | <i>moojeni</i>        |        | 4     | EU867256 | EU867268 |          | AF200222 |     | AF292644 |          |          |          |          |      |          |          |
| Crotalinae | <i>Bothrops</i>     | <i>neuwiedi</i>       |        | 4     |          | JQ627282 | JQ627371 | AF292585 |     | KF801287 |          |          |          |          |      |          |          |
| Crotalinae | <i>Bothrops</i>     | <i>oligolepis</i>     |        | 3     |          | KX660260 |          |          |     | KX660646 |          |          |          | KX652071 |      |          |          |
| Crotalinae | <i>Bothrops</i>     | <i>osbornei</i>       |        | 4     | KU999231 | KU999161 |          | KU999114 |     | AF292633 |          |          |          |          |      |          |          |
| Crotalinae | <i>Bothrops</i>     | <i>pauloensis</i>     |        | 4     | EU867260 | EU867272 |          | EU867284 |     | EU867296 |          |          |          |          |      |          |          |
| Crotalinae | <i>Bothrops</i>     | <i>pictus</i>         |        | 2     |          |          |          | AF292583 |     | AF292621 |          |          |          |          |      |          |          |
| Crotalinae | <i>Bothrops</i>     | <i>pubescens</i>      |        | 4     | JN870180 | JN870192 |          | JN870200 |     | KF801343 |          |          |          |          |      |          |          |
| Crotalinae | <i>Bothrops</i>     | <i>pulchra</i>        |        | 3     | JN870179 |          |          | AF292593 |     | AF292631 |          |          |          |          |      |          |          |
| Crotalinae | <i>Bothrops</i>     | <i>punctatus</i>      |        | 4     | KU999235 | KU999166 |          | KU999118 |     | AF292632 |          |          |          |          |      |          |          |
| Crotalinae | <i>Bothrops</i>     | <i>taeniatus</i>      |        | 4     | AF057215 | AF057262 |          | AY223592 |     | AF292629 |          |          |          |          |      |          |          |
| Crotalinae | <i>Calloselasma</i> | <i>rhodostoma</i>     |        | 9     | AF057190 | AF057237 |          | AY223562 |     | U41878   | KX694703 | KX694777 | KX694914 | KX694981 |      | KX695070 |          |
| Crotalinae | <i>Cerrophidion</i> | <i>godmani</i>        |        | 5     | DQ305419 | AF057250 |          | HE867046 |     | U41879   |          |          |          |          |      | KU234653 |          |
| Crotalinae | <i>Cerrophidion</i> | <i>petalcalensis</i>  |        | 4     | DQ305420 | DQ305443 |          | DQ061202 |     | DQ061227 |          |          |          |          |      |          |          |
| Crotalinae | <i>Cerrophidion</i> | <i>tzotzilorum</i>    |        | 4     | JN870182 | JN870193 |          | DQ061203 |     | DQ061228 |          |          |          |          |      |          |          |
| Crotalinae | <i>Cerrophidion</i> | <i>wilsoni</i>        |        | 4     | JQ724143 | JQ627129 |          | JQ724156 |     | JQ724175 |          |          |          |          |      |          |          |
| Crotalinae | <i>Crotalus</i>     | <i>adamanteus</i>     |        | 9     | AF259255 | AF259147 | KU985639 | KJ730274 |     | JN620959 |          | KX694780 | KX694921 | KX694982 |      | JN621000 |          |
| Crotalinae | <i>Crotalus</i>     | <i>aquilus</i>        |        | 4     | AF259232 | AF259125 |          | AF259162 |     | HQ257762 |          |          |          |          |      |          |          |

| Clade      | Genus                  | Species              | Sample | Genes | mtDNA     |           |           |           |           |           | nDNA     |          |          |          |          |          |          |
|------------|------------------------|----------------------|--------|-------|-----------|-----------|-----------|-----------|-----------|-----------|----------|----------|----------|----------|----------|----------|----------|
|            |                        |                      |        |       | 12S       | 16S       | COI       | CYTB      | ND2       | ND4       | BDNF     | CMOS     | JUN      | NT3      | PRLR     | RAG1     | UBN1     |
| Crotalinae | <i>Crotalus</i>        | <i>armstrongi</i>    |        | 3     | HQ257566  | HQ257529  |           |           |           |           | HQ257775 |          |          |          |          |          |          |
| Crotalinae | <i>Crotalus</i>        | <i>atrox</i>         |        | 9     | AF259256  | AF259148  | KU985749  | JN620810  | AY016239  | AY223646  |          | JN620892 |          | KX256628 |          | JN621001 |          |
| Crotalinae | <i>Crotalus</i>        | <i>basiliscus</i>    |        | 6     | AF259244  | AF259136  |           | AY704844  | AY704796  | AY704894  |          |          |          | KF410313 |          |          |          |
| Crotalinae | <i>Crotalus</i>        | <i>catalinensis</i>  |        | 3     | AF259259  | AF259151  |           | AF259189  |           |           |          |          |          |          |          |          |          |
| Crotalinae | <i>Crotalus</i>        | <i>cerastes</i>      |        | 9     | AF259235  | AF259128  | KU985599  | U69773    | AY016245  | JN620962  |          | JN620894 |          | KF410314 |          | JN621003 |          |
| Crotalinae | <i>Crotalus</i>        | <i>cerberus</i>      |        | 4     |           |           |           | JN620813  | AY016225  | JN620963  |          | JN620895 |          |          |          |          |          |
| Crotalinae | <i>Crotalus</i>        | <i>culminatus</i>    |        | 3     |           |           |           | AF393627  | AY704786  | AY704877  |          |          |          |          |          |          |          |
| Crotalinae | <i>Crotalus</i>        | <i>durissus</i>      |        | 6     | AF259248  | AF259138  | JQ627373  | AY196645  | AY704784  | AF194168  |          |          |          |          |          |          |          |
| Crotalinae | <i>Crotalus</i>        | <i>enyo</i>          |        | 4     | AF259245  | AF259137  |           | AF259175  | AY016246  |           |          |          |          |          |          |          |          |
| Crotalinae | <i>Crotalus</i>        | <i>ericsmithi</i>    |        | 5     |           |           |           | KF410284  |           | KF410289  |          | KF410301 |          | KF410315 |          | KF410330 |          |
| Crotalinae | <i>Crotalus</i>        | <i>horridus</i>      |        | 9     | NC_014400 | NC_014400 | NC_014400 | NC_014400 | NC_014400 | NC_014400 |          | JN620897 |          | KF410316 |          | JN621004 |          |
| Crotalinae | <i>Crotalus</i>        | <i>intermedius</i>   |        | 3     | AF259238  | AF259131  |           |           |           | JN870208  |          |          |          |          |          |          |          |
| Crotalinae | <i>Crotalus</i>        | <i>lannomi</i>       |        | 5     |           |           |           | KF410280  |           | KF410291  |          | KF410303 |          | KF410317 |          | KF410331 |          |
| Crotalinae | <i>Crotalus</i>        | <i>lepidus</i>       |        | 7     | AF259230  | AF259123  | KU985625  | JN620816  |           | U41881    |          | JN620898 |          |          |          | JN621005 |          |
| Crotalinae | <i>Crotalus</i>        | <i>mitchellii</i>    |        | 8     | AF259250  | AF259142  | KU985590  | JN620817  | AY016241  | JN620967  |          | JN620899 |          |          |          | JN621006 |          |
| Crotalinae | <i>Crotalus</i>        | <i>molossus</i>      |        | 8     | AF259243  | AF259135  | KU985681  | JN620822  | AY704797  | AY223645  |          | JN620902 |          |          |          | JN621009 |          |
| Crotalinae | <i>Crotalus</i>        | <i>oreganus</i>      |        | 6     | DQ020024  |           | KU985566  | JN620814  | AY016217  | U41882    |          | AF471135 |          |          |          |          |          |
| Crotalinae | <i>Crotalus</i>        | <i>polystictus</i>   |        | 7     | AF259236  | AF259129  |           | KF410281  |           | KF410294  |          | KF410305 |          | KF410320 |          | KF410332 |          |
| Crotalinae | <i>Crotalus</i>        | <i>pricei</i>        |        | 7     | AF259237  | AF259130  | KU985692  | AF259167  |           | JN022844  |          | KF410306 |          | KF410321 |          |          |          |
| Crotalinae | <i>Crotalus</i>        | <i>pusillus</i>      |        | 4     | AF259229  | AF259122  |           | AF259159  |           | HQ257774  |          |          |          |          |          |          |          |
| Crotalinae | <i>Crotalus</i>        | <i>ravus</i>         |        | 4     | AF259228  | AF259121  |           | AY223609  |           | AY223647  |          |          |          |          |          |          |          |
| Crotalinae | <i>Crotalus</i>        | <i>ruber</i>         |        | 6     | AF259261  | AF259152  | KU985635  | KP765661  |           | DQ679838  |          | KP765643 |          |          |          |          |          |
| Crotalinae | <i>Crotalus</i>        | <i>scutulatus</i>    |        | 7     | AF259254  | AF259146  | KU985747  | AF292571  | AY016237  | AF292609  |          |          |          | KX256582 |          |          |          |
| Crotalinae | <i>Crotalus</i>        | <i>simus</i>         |        | 3     | EU624240  | GQ372869  |           | HE867034  |           |           |          |          |          |          |          |          |          |
| Crotalinae | <i>Crotalus</i>        | <i>stejnegeri</i>    |        | 5     |           |           |           | KF410283  |           | KF410295  |          | KF410307 |          | KF410323 |          | KF410333 |          |
| Crotalinae | <i>Crotalus</i>        | <i>tancitarensis</i> |        | 3     | JN022897  | JN022897  |           |           |           | JN022842  |          |          |          |          |          |          |          |
| Crotalinae | <i>Crotalus</i>        | <i>tigris</i>        | *      | 9     | AF259249  | AF259141  | KU985565  | JN620818  | AY016240  | AF156574  |          | JN620900 |          | GQ334665 |          | JN621007 |          |
| Crotalinae | <i>Crotalus</i>        | <i>tonotacus</i>     |        | 3     |           |           |           | AY704837  | AY704795  | AY704887  |          |          |          |          |          |          |          |
| Crotalinae | <i>Crotalus</i>        | <i>transversus</i>   |        | 4     | JN022895  | JN022895  |           | AF259169  |           | JN022840  |          |          |          |          |          |          |          |
| Crotalinae | <i>Crotalus</i>        | <i>triseriatus</i>   |        | 6     | AF259233  | AF259124  |           | AF259163  |           | HQ257761  |          | KF410310 |          | KF410325 |          |          |          |
| Crotalinae | <i>Crotalus</i>        | <i>tzabcan</i>       |        | 3     |           |           |           | AF393625  | AY704791  | AY704856  |          |          |          |          |          |          |          |
| Crotalinae | <i>Crotalus</i>        | <i>viridis</i>       |        | 9     | DQ020027  | AF259145  | KU985701  | JN620819  | AY016218  | JN620969  |          | JN620901 |          | KX256604 |          | JN621008 |          |
| Crotalinae | <i>Crotalus</i>        | <i>willardi</i>      |        | 9     | AF259240  | AF259132  | KU985952  | AF259170  |           | JN870209  |          | KX694712 | KX694781 | KF410326 |          | KX695078 |          |
| Crotalinae | <i>Deinagkistrodon</i> | <i>acutus</i>        |        | 11    | NC_010223 | NC_010223 | NC_010223 | NC_010223 | NC_010223 | NC_010223 |          | KX694713 | KX694782 | KX694923 | KX694984 |          | KX695079 |
| Crotalinae | <i>Garthius</i>        | <i>chasaki</i>       |        | 4     | AY352791  | AY352729  |           | AY352760  |           | AY352825  |          |          |          |          |          |          |          |
| Crotalinae | <i>Gloydus</i>         | <i>blomhoffii</i>    |        | 3     | EF012800  |           |           | JF357942  |           | U41867    |          |          |          |          |          |          |          |
| Crotalinae | <i>Gloydus</i>         | <i>brevicaudus</i>   |        | 7     | NC_011390 | NC_011390 | NC_011390 | NC_011390 | NC_011390 | NC_011390 |          | JF827697 |          |          |          |          |          |
| Crotalinae | <i>Gloydus</i>         | <i>halys</i>         | *      | 9     | AF057191  | AF057238  | KR046004  | AY223564  | AY662540  | JQ356856  |          | KX694722 |          | KX694985 |          | AY662614 |          |
| Crotalinae | <i>Gloydus</i>         | <i>intermedius</i>   |        | 7     | NC_025560 | NC_025560 | NC_025560 | NC_025560 | NC_025560 | NC_025560 |          | JQ687507 |          |          |          |          |          |
| Crotalinae | <i>Gloydus</i>         | <i>lijianlii</i>     |        | 2     |           |           |           | KF997904  |           | KF997956  |          |          |          |          |          |          |          |



| Clade      | Genus                | Species               | Sample | Genes | mtDNA     |           |           |           |           |           | nDNA      |          |          |          |          |          |          |          |
|------------|----------------------|-----------------------|--------|-------|-----------|-----------|-----------|-----------|-----------|-----------|-----------|----------|----------|----------|----------|----------|----------|----------|
|            |                      |                       |        |       | 12S       | 16S       | COI       | CYTB      | ND2       | ND4       | BDNF      | CMOS     | JUN      | NT3      | PRLR     | RAG1     | UBN1     |          |
| Crotalinae | <i>Gloydius</i>      | <i>liupanensis</i>    |        | 3     |           |           |           |           | JQ687491  |           | JQ687472  |          |          | JQ687510 |          |          |          |          |
| Crotalinae | <i>Gloydius</i>      | <i>monticola</i>      |        | 2     |           |           |           |           | KF997903  |           | KF997977  |          |          |          |          |          |          |          |
| Crotalinae | <i>Gloydius</i>      | <i>rickmersi</i>      |        | 1     |           |           |           |           |           |           | KM078592  |          |          |          |          |          |          |          |
| Crotalinae | <i>Gloydius</i>      | <i>saxatilis</i>      |        | 7     | NC_025666 | NC_025666 | NC_025666 | NC_025666 | NC_025666 | NC_025666 | NC_025666 |          |          | JQ687508 |          |          |          |          |
| Crotalinae | <i>Gloydius</i>      | <i>shedaensis</i>     |        | 7     | NC_029424 | NC_029424 | NC_029424 | NC_029424 | NC_029424 | NC_029424 | NC_029424 |          |          | JQ687517 |          |          |          |          |
| Crotalinae | <i>Gloydius</i>      | <i>strauchi</i>       |        | 9     | EF012814  | AF057239  |           |           | JQ687490  |           | JQ687471  | KX694723 | KX694784 | KX694932 | KX694986 |          | KX695088 |          |
| Crotalinae | <i>Gloydius</i>      | <i>tsushimaensis</i>  |        | 4     | JN870186  | JN870196  |           |           | JN870203  |           | JN870211  |          |          |          |          |          |          |          |
| Crotalinae | <i>Gloydius</i>      | <i>ussuriensis</i>    |        | 7     | NC_026553 | NC_026553 | NC_026553 | NC_026553 | NC_026553 | NC_026553 | NC_026553 |          |          | JQ687520 |          |          |          |          |
| Crotalinae | <i>Hypnale</i>       | <i>hypnale</i>        |        | 4     | AF057189  | AF057236  |           |           | AY352750  |           | U41884    |          |          |          |          |          |          |          |
| Crotalinae | <i>Hypnale</i>       | <i>nepa</i>           |        | 6     | KC347325  | KC347362  |           |           | KC347485  |           | KC347491  |          |          | KC347401 |          |          | KC347439 |          |
| Crotalinae | <i>Hypnale</i>       | <i>zara</i>           |        | 6     | KC347326  | KC347363  |           |           | KC347463  |           | KC347513  |          |          | KC347402 |          |          | KC347440 |          |
| Crotalinae | <i>Lachesis</i>      | <i>acrochorda</i>     |        | 4     | JN870187  | JN870197  |           |           | JN870204  |           | JN870212  |          |          |          |          |          |          |          |
| Crotalinae | <i>Lachesis</i>      | <i>melanocephala</i>  |        | 2     |           |           |           |           | U96018    |           | U96028    |          |          |          |          |          |          |          |
| Crotalinae | <i>Lachesis</i>      | <i>muta</i>           |        | 6     | AF057221  | AF057268  |           |           | AY223604  |           | AY223644  |          |          |          | EU390924 | JN880845 |          |          |
| Crotalinae | <i>Lachesis</i>      | <i>stenophrys</i>     |        | 5     | AF057220  | AF057267  |           |           | AY223603  |           | U96026    | EU402644 |          |          |          |          |          |          |
| Crotalinae | <i>Mixocoatlus</i>   | <i>barbouri</i>       |        | 4     | HM363639  | HM363640  |           |           | HM363641  |           | HM363642  |          |          |          |          |          |          |          |
| Crotalinae | <i>Mixocoatlus</i>   | <i>browni</i>         |        | 4     | HM363643  | HM363644  |           |           | HM363649  |           | HM363653  |          |          |          |          |          |          |          |
| Crotalinae | <i>Mixocoatlus</i>   | <i>melanurus</i>      |        | 4     | AF057210  | AF057257  |           |           | AY223587  |           | AY223634  |          |          |          |          |          |          |          |
| Crotalinae | <i>Ophryacus</i>     | <i>undulatus</i>      |        | 4     | AF057209  | AF057256  |           |           | AY223586  |           | AY223633  |          |          |          |          |          |          |          |
| Crotalinae | <i>Ovophis</i>       | <i>convictus</i>      |        | 4     | HQ325265  | HQ325083  |           |           | HQ325141  |           | HQ325190  |          |          |          |          |          |          |          |
| Crotalinae | <i>Ovophis</i>       | <i>monticola</i>      |        | 10    | AY763192  | AY763211  |           |           | HQ325124  |           | AY059582  | KX694744 | KX694788 |          | KX694987 | KT220344 | KX695103 | KT220381 |
| Crotalinae | <i>Ovophis</i>       | <i>okinavensis</i>    |        | 6     | AB175670  | AB175670  | AB175670  | AB175670  | AB175670  | AB175670  | AB175670  |          |          |          |          |          |          |          |
| Crotalinae | <i>Ovophis</i>       | <i>tonkinensis</i>    |        | 4     | HQ325308  | HQ325092  |           |           | HQ325132  |           | HQ325191  |          |          |          |          |          |          |          |
| Crotalinae | <i>Ovophis</i>       | <i>zayuensis</i>      |        | 4     | HQ325294  | HQ325118  |           |           | HQ325150  |           | HQ325208  |          |          |          |          |          |          |          |
| Crotalinae | <i>Porthidium</i>    | <i>arcosae</i>        |        | 5     | EU624241  | GQ372871  |           |           | AF292575  |           | AF292613  |          |          |          |          |          | KU234654 |          |
| Crotalinae | <i>Porthidium</i>    | <i>dumi</i>           |        | 4     | AY223654  | AY223667  |           |           | AY223581  |           | AY223630  |          |          |          |          |          |          |          |
| Crotalinae | <i>Porthidium</i>    | <i>hespere</i>        |        | 2     |           |           |           |           | EU017535  |           | EU016098  |          |          |          |          |          |          |          |
| Crotalinae | <i>Porthidium</i>    | <i>lansbergii</i>     |        | 4     | AY223655  | GQ372870  |           |           | DQ061205  |           | DQ061230  |          |          |          |          |          |          |          |
| Crotalinae | <i>Porthidium</i>    | <i>nasutum</i>        |        | 9     | AF057204  | AF057251  |           |           | AY223579  |           | DQ061232  | KX694748 | KX694790 | KX694954 | KX694988 |          | KU234655 |          |
| Crotalinae | <i>Porthidium</i>    | <i>ophryomegas</i>    |        | 4     | AF057205  | AF057252  |           |           | AY223580  |           | U41888    |          |          |          |          |          |          |          |
| Crotalinae | <i>Porthidium</i>    | <i>porrasi</i>        |        | 4     | DQ305421  | DQ305444  |           |           | DQ061211  |           | DQ061236  |          |          |          |          |          |          |          |
| Crotalinae | <i>Porthidium</i>    | <i>yucatanicum</i>    |        | 4     | JN870189  | JN870198  |           |           | DQ061215  |           | DQ061244  |          |          |          |          |          |          |          |
| Crotalinae | <i>Protobothrops</i> | <i>cornutus</i>       |        | 10    | NC_022695 | NC_022695 | NC_022695 | NC_022695 | NC_022695 | NC_022695 | NC_022695 |          |          | KT220399 |          | KT220346 | KT220363 | KT220383 |
| Crotalinae | <i>Protobothrops</i> | <i>dabieshanensis</i> |        | 10    | NC_022473 | NC_022473 | NC_022473 | NC_022473 | NC_022473 | NC_022473 | NC_022473 |          |          | KT220400 |          | KT220347 | KT220364 | KT220384 |
| Crotalinae | <i>Protobothrops</i> | <i>elegans</i>        |        | 6     | LC073748  | LC073748  | LC073748  | LC073748  | LC073748  | LC073748  | LC073748  |          |          |          |          |          |          |          |
| Crotalinae | <i>Protobothrops</i> | <i>flavoviridis</i>   |        | 6     | LC073706  | LC073706  | LC073706  | LC073706  | LC073706  | LC073706  | LC073706  |          |          |          |          |          |          |          |
| Crotalinae | <i>Protobothrops</i> | <i>himalayanus</i>    |        | 10    | NC_029165 | NC_029165 | NC_029165 | NC_029165 | NC_029165 | NC_029165 | NC_029165 |          |          | KT220401 |          | KT220348 | KT220366 | KT220385 |
| Crotalinae | <i>Protobothrops</i> | <i>jerdonii</i>       |        | 7     | NC_021402 | NC_021402 | NC_021402 | NC_021402 | NC_021402 | NC_021402 | NC_021402 |          |          | KF997929 |          |          |          |          |
| Crotalinae | <i>Protobothrops</i> | <i>kaulbacki</i>      |        | 10    | NC_029166 | NC_029166 | NC_029166 | NC_029166 | NC_029166 | NC_029166 | NC_029166 |          |          | KT220402 |          | KT220349 | KT220367 | KT220387 |
| Crotalinae | <i>Protobothrops</i> | <i>mangshanensis</i>  |        | 10    | NC_026052 | NC_026052 | NC_026052 | NC_026052 | NC_026052 | NC_026052 | NC_026052 |          |          | JQ687524 |          | KT220351 | KT220368 | KT220388 |

| Clade      | Genus                | Species                  | Sample | Genes | mtDNA     |           |           |           |           |           | nDNA         |          |              |          |          |              |          |
|------------|----------------------|--------------------------|--------|-------|-----------|-----------|-----------|-----------|-----------|-----------|--------------|----------|--------------|----------|----------|--------------|----------|
|            |                      |                          |        |       | 12S       | 16S       | COI       | CYTB      | ND2       | ND4       | BDNF         | CMOS     | JUN          | NT3      | PRLR     | RAG1         | UBN1     |
| Crotalinae | <i>Protobothrops</i> | <i>maolanensis</i>       |        | 10    | NC_026051 | NC_026051 | NC_026051 | NC_026051 | NC_026051 | NC_026051 |              | KT220406 |              |          | KT220352 | KT220370     | KT220389 |
| Crotalinae | <i>Protobothrops</i> | <i>mucrosquamatus</i>    | *      | 12    | NC_021412 | NC_021412 | NC_021412 | NC_021412 | NC_021412 | NC_021412 | XM_015815390 | KT220410 | XM_015831561 |          | KT220356 | XM_015822485 | KT220393 |
| Crotalinae | <i>Protobothrops</i> | <i>sieversorum</i>       |        | 8     | KT220280  | DQ305437  |           | KT220320  |           | DQ305478  |              | KT220414 |              |          | KT220360 | KT220378     | KT220395 |
| Crotalinae | <i>Protobothrops</i> | <i>tokarensis</i>        |        | 6     | NC_030182 | NC_030182 | NC_030182 | NC_030182 | NC_030182 | NC_030182 |              |          |              |          |          |              |          |
| Crotalinae | <i>Protobothrops</i> | <i>trungkhanhensis</i>   |        | 8     | KT220282  | KT220302  |           | KT220321  |           | KT220341  |              | KT220417 |              |          | KT220361 | KT220379     | KT220397 |
| Crotalinae | <i>Protobothrops</i> | <i>xiangchengensis</i>   |        | 7     | KF460436  | KF460436  | KF460436  | KF460436  | KF460436  | KF460436  |              | KF997928 |              |          |          |              |          |
| Crotalinae | <i>Sistrurus</i>     | <i>catenatus</i>         | *      | 8     | AF259226  | AF259119  | KU986216  | AY223610  | JQ609661  | AF156575  |              | KF410311 |              | GQ334686 |          |              |          |
| Crotalinae | <i>Sistrurus</i>     | <i>miliarius</i>         |        | 6     | AF259227  | AF259120  | KU985759  | EU483385  | GQ359815  | HQ257760  |              |          |              |          |          |              |          |
| Crotalinae | <i>Trimeresurus</i>  | <i>albolabris</i>        |        | 8     | NC_022820 | NC_022820 | NC_022820 | NC_022820 | NC_022820 | NC_022820 |              |          |              | KP999637 |          | KP999549     |          |
| Crotalinae | <i>Trimeresurus</i>  | <i>andersonii</i>        |        | 3     | AY352801  | AY352740  |           |           |           | AY352835  |              |          |              |          |          |              |          |
| Crotalinae | <i>Trimeresurus</i>  | <i>borneensis</i>        |        | 4     | AY352783  | AY352722  |           | AY352754  |           | AY352817  |              |          |              |          |          |              |          |
| Crotalinae | <i>Trimeresurus</i>  | <i>buniana</i>           |        | 6     |           | KX660233  |           | KX660502  |           | KX660631  |              | KX660374 |              | KX652049 |          | KX660131     |          |
| Crotalinae | <i>Trimeresurus</i>  | <i>cantori</i>           |        | 4     | AF057196  | AF057243  |           | AY223568  |           | U41891    |              |          |              |          |          |              |          |
| Crotalinae | <i>Trimeresurus</i>  | <i>cardamomensis</i>     |        | 6     | KR021095  | KR021129  |           |           |           | KR021061  |              | KX660361 |              | KX652036 |          | KX660120     |          |
| Crotalinae | <i>Trimeresurus</i>  | <i>erythrurus</i>        |        | 4     | AF517161  | AF517174  |           | AY352768  |           | AF517217  |              |          |              |          |          |              |          |
| Crotalinae | <i>Trimeresurus</i>  | <i>fasciatus</i>         |        | 4     | GQ428492  | GQ428466  |           | GQ428475  |           | GQ428482  |              |          |              |          |          |              |          |
| Crotalinae | <i>Trimeresurus</i>  | <i>flavomaculatus</i>    |        | 4     | AY059535  | AY352734  |           | AF171916  |           | AY352830  |              |          |              |          |          |              |          |
| Crotalinae | <i>Trimeresurus</i>  | <i>fucatus</i>           |        | 6     |           | KX660235  |           | KX660505  |           | KX660633  |              | KX660376 |              | KX652051 |          | KX660133     |          |
| Crotalinae | <i>Trimeresurus</i>  | <i>gracilis</i>          |        | 4     | DQ305415  | DQ305438  |           | DQ305461  |           | DQ305479  |              |          |              |          |          |              |          |
| Crotalinae | <i>Trimeresurus</i>  | <i>gramineus</i>         |        | 4     | AY352793  | AY352731  |           | AY352762  |           | AY352828  |              |          |              |          |          |              |          |
| Crotalinae | <i>Trimeresurus</i>  | <i>gumprechtii</i>       |        | 6     | KT216287  | GQ428461  | KC171170  | KT216377  |           | AY352832  |              |          |              | KX019436 |          |              |          |
| Crotalinae | <i>Trimeresurus</i>  | <i>hageni</i>            |        | 4     | AY371755  | GQ428462  |           | AY059567  |           | AY371867  |              |          |              |          |          |              |          |
| Crotalinae | <i>Trimeresurus</i>  | <i>honsonensis</i>       |        | 5     |           | KX660222  |           |           |           | KX660620  |              | KX660363 |              | KX652038 |          | KX660121     |          |
| Crotalinae | <i>Trimeresurus</i>  | <i>insularis</i>         |        | 4     | AF517159  | AF517172  |           | AY059568  |           | AF517215  |              |          |              |          |          |              |          |
| Crotalinae | <i>Trimeresurus</i>  | <i>kanburiensis</i>      |        | 4     | AY289219  | AY352737  |           | AY289225  |           | AY289231  |              |          |              |          |          |              |          |
| Crotalinae | <i>Trimeresurus</i>  | <i>macrops</i>           |        | 5     | AF517163  | AF517176  |           | KP999371  |           | KP999465  |              |          |              | KP999625 |          |              |          |
| Crotalinae | <i>Trimeresurus</i>  | <i>malabaricus</i>       |        | 4     | AY059548  | AY352733  |           | AY352763  |           | AY352829  |              |          |              |          |          |              |          |
| Crotalinae | <i>Trimeresurus</i>  | <i>malcolmi</i>          |        | 4     | AY371758  | AY371793  |           | AY371832  |           | AY371861  |              |          |              |          |          |              |          |
| Crotalinae | <i>Trimeresurus</i>  | <i>mcgregori</i>         |        | 4     | AY371756  | AY371795  |           | AY371831  |           | AY371858  |              |          |              |          |          |              |          |
| Crotalinae | <i>Trimeresurus</i>  | <i>medoensis</i>         |        | 4     | AY352797  | AY352735  |           | AY352765  |           | AY352831  |              |          |              |          |          |              |          |
| Crotalinae | <i>Trimeresurus</i>  | <i>nebularis</i>         |        | 6     |           | KX660236  |           | KX660506  |           | KX660634  |              | KX660377 |              | KX652052 |          | KX660134     |          |
| Crotalinae | <i>Trimeresurus</i>  | <i>popoiorum</i>         |        | 4     | KT216266  | AY371768  |           | KT216359  |           | AY371835  |              |          |              |          |          |              |          |
| Crotalinae | <i>Trimeresurus</i>  | <i>puniceus</i>          |        | 4     | AF517164  | AF517177  |           | AY352757  |           | AY352820  |              |          |              |          |          |              |          |
| Crotalinae | <i>Trimeresurus</i>  | <i>purpureomaculatus</i> |        | 4     | AY352806  | AF517175  |           | AY352772  |           | AY352841  |              |          |              |          |          |              |          |
| Crotalinae | <i>Trimeresurus</i>  | <i>rubeus</i>            |        | 3     | KR021105  | KR021141  |           |           |           | KR021063  |              |          |              |          |          |              |          |
| Crotalinae | <i>Trimeresurus</i>  | <i>sabahi</i>            |        | 2     |           |           |           | KP899261  |           | KP939319  |              |          |              |          |          |              |          |
| Crotalinae | <i>Trimeresurus</i>  | <i>schultzei</i>         |        | 4     | AY352785  | AY352725  |           | AY352756  |           | AY352819  |              |          |              |          |          |              |          |
| Crotalinae | <i>Trimeresurus</i>  | <i>septentrionalis</i>   |        | 6     | AY352784  | AY352724  |           | KP999348  |           | KP999443  |              |          |              | KP999618 |          | KP999536     |          |
| Crotalinae | <i>Trimeresurus</i>  | <i>sichuanensis</i>      |        | 6     | NC_029494 | NC_029494 | NC_029494 | NC_029494 | NC_029494 | NC_029494 |              |          |              |          |          |              |          |
| Crotalinae | <i>Trimeresurus</i>  | <i>stejnegeri</i>        |        | 11    | NC_012146 | NC_012146 | NC_012146 | NC_012146 | NC_012146 | NC_012146 | KX694769     | KX694793 | KX694973     | KX019417 |          | KX695119     |          |

| Clade          | Genus                | Species                | Sample | Genes | mtDNA     |           |           |           |           |           | nDNA     |          |          |          |          |          |          |
|----------------|----------------------|------------------------|--------|-------|-----------|-----------|-----------|-----------|-----------|-----------|----------|----------|----------|----------|----------|----------|----------|
|                |                      |                        |        |       | 12S       | 16S       | COI       | CYTB      | ND2       | ND4       | BDNF     | CMOS     | JUN      | NT3      | PRLR     | RAG1     | UBN1     |
| Crotalinae     | <i>Trimeresurus</i>  | <i>sumatranus</i>      |        | 4     | AY371759  | AY371788  |           | AY371824  |           | AY371865  |          |          |          |          |          |          |          |
| Crotalinae     | <i>Trimeresurus</i>  | <i>tibetanus</i>       |        | 4     | AY352776  | AY352715  |           | AY352749  |           | AY352810  |          |          |          |          |          |          |          |
| Crotalinae     | <i>Trimeresurus</i>  | <i>trigonocephalus</i> |        | 6     | KC347336  | AY059565  | KU986306  | KC347479  |           | AY059597  |          | KC347412 |          |          |          |          |          |
| Crotalinae     | <i>Trimeresurus</i>  | <i>truongsonensis</i>  |        | 4     | EU443817  | EU443818  |           | EU443815  |           | EU443816  |          |          |          |          |          |          |          |
| Crotalinae     | <i>Trimeresurus</i>  | <i>venustus</i>        |        | 4     | AY293931  | AY352723  |           | AF171914  |           | KR021049  |          |          |          |          |          |          |          |
| Crotalinae     | <i>Trimeresurus</i>  | <i>vogeli</i>          |        | 5     | AF517170  | AF517183  |           | AY059574  |           | AF517225  |          |          |          | KX019315 |          |          |          |
| Crotalinae     | <i>Trimeresurus</i>  | <i>wiroti</i>          |        | 1     |           |           |           | DQ646788  |           |           |          |          |          |          |          |          |          |
| Crotalinae     | <i>Trimeresurus</i>  | <i>yunnanensis</i>     |        | 6     | EU443811  | EU443812  | KC171173  | EF597523  |           | EF597528  |          |          |          | KX019380 |          |          |          |
| Crotalinae     | <i>Tropidolaemus</i> | <i>subannulatus</i>    |        | 4     |           | KX660255  |           | KX660525  |           | KX660644  |          | KX660396 |          |          |          |          |          |
| Crotalinae     | <i>Tropidolaemus</i> | <i>wagleri</i>         |        | 5     | AF057198  | AF057245  | KU986318  | GQ428472  |           | U41896    |          |          |          |          |          |          |          |
| Boidae         | <i>Boa</i>           | <i>constrictor</i>     | *      | 12    | NC_007398 | NC_007398 | NC_007398 | NC_007398 | NC_007398 | NC_007398 | AY988030 | AF544676 |          | HQ399534 | JN880812 | KF576890 | JF806219 |
| Colubridae     | <i>Coronella</i>     | <i>austriaca</i>       | *      | 10    | KX694589  | KX694634  | KC997577  | KX694868  | AY487026  | AY487065  | KX694711 | AY486954 |          | KX695008 |          | KX695077 |          |
| Colubridae     | <i>Eirenis</i>       | <i>modestus</i>        | *      | 10    | AY039143  | KX694641  | AY039181  | KX694864  | AY487033  | AY487072  | KX694718 | KX694807 |          | KX695014 |          | KX695084 |          |
| Colubridae     | <i>Gonyosoma</i>     | <i>oxycephalum</i>     | *      | 11    | AY122678  | KX694646  | LC075339  | KX694870  | DQ902241  | DQ902309  | KX694725 | KX694808 | KX694934 | KX695018 |          | KX695090 |          |
| Colubridae     | <i>Pituophis</i>     | <i>deppesi</i>         | *      | 11    | KX694582  | KX694657  | AY122741  | KX694867  | FJ627848  | AF141096  | KX694747 | KX694814 | KX694953 | KX695037 |          | KX695104 |          |
| Colubridae     | <i>Spalerosophis</i> | <i>diadema</i>         | *      | 11    | KX694605  | KX694668  | AY039186  | KX694865  | AY487020  | AY487059  | KX694764 | KX694820 | KX694970 | KX695051 |          | KX695115 |          |
| Cylindrophidae | <i>Cylindrophis</i>  | <i>ruffus</i>          | *      | 11    | NC_007401 | NC_007401 | NC_007401 | NC_007401 | NC_007401 | NC_007401 | EU402635 | AF471133 | KX694922 | AY988054 |          | AY662613 |          |
| Elapidae       | <i>Bungarus</i>      | <i>fasciatus</i>       | *      | 11    | NC_011393 | NC_011393 | NC_011393 | EU579523  | NC_011393 | EU579523  | KX694700 | KX694826 | KX694911 | KX694998 |          | AY487389 |          |
| Elapidae       | <i>Ophiophagus</i>   | <i>hannah</i>          | *      | 11    | NC_011394 | NC_011394 | NC_011394 | NC_011394 | NC_011394 | NC_011394 | KX694743 | KX694798 | KX694950 | KX695035 |          | KX695102 |          |

**Supplementary Table S2.** Genetic markers used for the phylogenetic analyses, their respective alignment lengths and rates of molecular evolution as resulting from the FBD analysis.

| <b>Genome</b> | <b>Gene</b> | <b>Source of primers and PCR protocols for newly generated sequences</b> | <b>Alignment length (bp)</b> | <b>Evolutionary rate (mean <math>\pm</math> standard error)</b> |
|---------------|-------------|--------------------------------------------------------------------------|------------------------------|-----------------------------------------------------------------|
| mtDNA         | 12S         |                                                                          | 371                          | 0.00423 $\pm$ 0.00001                                           |
|               | 16S         | Wüster et al. (2008)                                                     | 429                          | 0.00324 $\pm$ 0.00001                                           |
|               | cox1        |                                                                          | 944                          | 0.01000 $\pm$ 0.00004                                           |
|               | cytb        | Burbrink et al. (2000)                                                   | 1131                         | 0.01090 $\pm$ 0.00003                                           |
|               | nd2         | Barlow et al. (2012)                                                     | 1032                         | 0.00976 $\pm$ 0.00003                                           |
|               | nd4         | Wüster et al. (2008)                                                     | 825                          | 0.00706 $\pm$ 0.00002                                           |
|               | nDNA        | bdnf                                                                     |                              | 668                                                             |
| cmos          |             | Lawson et al. (2005)                                                     | 719                          | 0.00051 $\pm$ 1.39E-06                                          |
| jun           |             |                                                                          | 343                          | 0.00046 $\pm$ 2.14E-06                                          |
| nt3           |             |                                                                          | 519                          | 0.00117 $\pm$ 3.46E-06                                          |
| prlr          |             | Barlow et al. (2012)                                                     | 559                          | 0.00096 $\pm$ 2.85E-06                                          |
| rag1          |             |                                                                          | 2405                         | 0.00038 $\pm$ 1.14E-06                                          |
| ubn1          |             | Barlow et al. (in press)                                                 | 473                          | 0.00094 $\pm$ 2.66E-06                                          |

**Supplementary Table S3.** A list of viper fossils that were used for calibrating divergence times under the FBD model, their phylogenetic position, minimum and maximum estimated stratigraphic age, and locality details. The 'Notes' field contains details regarding the morphology or phylogenetic affinity of some of the specimens as described in the reference cited.

| Fossil                    | Phylogenetic affinity      | Min age | Max age | Country  | Locality                         | Lat     | Long    | Notes                                                                                                                                                             | Reference                   |
|---------------------------|----------------------------|---------|---------|----------|----------------------------------|---------|---------|-------------------------------------------------------------------------------------------------------------------------------------------------------------------|-----------------------------|
| Bitis arietans            | Bitis arietans             | 2.5     | 2.5     | Morocco  | Ahl al Oughlam (near Casablanca) | 33.5931 | -7.6164 |                                                                                                                                                                   | Geraads 2006                |
| Bitis cf. olduvaiensis    | sister to Bitis arietans   | 2.66    | 3.85    | Tanzania | Laetoli                          | -2.9962 | 35.3524 |                                                                                                                                                                   | Rage 1973                   |
| Bitis olduvaiensis        | sister to Bitis arietans   | 1.7     | 1.845   | Tanzania | Olduvai Rift Valley              | -2.983  | 35.35   | Fossil assignment unclear, can be either B. olduvaiensis or B. arietans                                                                                           | Rage 1973                   |
| Bitis sp.                 | Bitis                      | 17      | 17.5    | Namibia  | Arrisdriфт                       | -28.55  | 16.5    | The earliest fossil record of the genus Bitis                                                                                                                     | Rage 2003                   |
| Daboia mauritanica        | Daboia mauritanica         | 0.005   | 0.005   | Morocco  | El Harhoura 2 (Temara)           | 33.9522 | -6.9259 |                                                                                                                                                                   | Böhme and Ilg 2003          |
| Daboia mauritanica        | Daboia mauritanica         | 0.01    | 0.2     | Morocco  | El Harhoura 1 (Temara)           | 33.95   | -6.9333 |                                                                                                                                                                   | Böhme and Ilg 2003          |
| Daboia maxima             | Daboia                     | 3.5     | 3.6     | Spain    | Layna, Province de Soria         | 41.1    | -2.3    |                                                                                                                                                                   | Böhme and Ilg 2003          |
| Macrovipera burgenlandica | sister to M. gedulyi       | 8.55    | 8.95    | Austria  | Kohfidisch                       | 47.1667 | 16.35   | Typical member of the 'Oriental vipers'; display features characteristic for the living species M. lebetina, D. palaestinae, and M. xanthina, but not D. russelli | Bachmayer and Syzndlar 1987 |
| Macrovipera gedulyi       | sister to M. burgenlandica | 5.35    | 6.15    | Hungary  | Polgardi                         | 47.05   | 18.3    | The prefrontal somewhat resembles that of M. lebetina, closely related with the extinct M. burgenlandica                                                          | Venczel 1998                |

| Fossil                   | Phylogenetic affinity                                                                         | Min age | Max age | Country        | Locality                              | Lat     | Long    | Notes                                                                                                                                                                                                                                | Reference               |
|--------------------------|-----------------------------------------------------------------------------------------------|---------|---------|----------------|---------------------------------------|---------|---------|--------------------------------------------------------------------------------------------------------------------------------------------------------------------------------------------------------------------------------------|-------------------------|
| Macrovipera gedulyi      | sister to M. burgenlandica                                                                    | 5.33    | 6.2     | Hungary        | Polgardi                              | 47.05   | 18.3    | The prefrontal somewhat resembles that of M. lebetina, closely related with the extinct M. burgenlandica                                                                                                                             | Venczel 1998            |
| Macrovipera sp.          | Macrovipera                                                                                   | 11.85   | 12.05   | Romania        | Taut, Arad district                   | 46.2833 | 21.9333 |                                                                                                                                                                                                                                      | Venczel and Stiuca 2008 |
| Macrovipera kuchurganica | Macrovipera                                                                                   | 4.85    | 5.25    | Ukraine        | Kuchurgan                             | 46.75   | 29.9833 | Considered a close relative of the extant Vipera lebetina                                                                                                                                                                            | Szyndlar and Rage 2002  |
| Montivipera xanthina     | Montivipera xanthina                                                                          | 4.631   | 4.799   | Armenia        | Nurnus, Kotayk Province               | 40.3534 | 44.6082 |                                                                                                                                                                                                                                      | Böhme and Ilg 2003      |
| Vipera platyspondyla     | A clade of Macrovipera + Montivipera                                                          | 17      | 17.5    | Czech Republic | Dolnice near Cheb                     | 50.0833 | 12.3833 | Appears closest to M. xanthina, but M. lebetina is morphologically variable in the characters examined so close relationship to this species cannot be ruled out                                                                     | Szyndlar 1987           |
| Vipera platyspondyla     | A clade of Macrovipera + Montivipera                                                          | 17.5    | 18      | Germany        | Petersbuch 2                          | 48.9779 | 11.1909 | Appears closest to M. xanthina, but M. lebetina is morphologically variable in the characters examined so close relationship to this species cannot be ruled out                                                                     | Szyndlar 1987           |
| Vipera sp.               | A clade of Macrovipera + Montivipera                                                          | 5       | 5.33    | Spain          | Calo d'en Rafelino, Manacor, Mallorca | 39.5566 | 3.3647  | The possible presence of a neural spine longer than high in the fossil trunk vertebra allows us to identify the fossil as belonging to the 'Oriental vipers' and differentiate it from Daboia, which displays a higher neural spine. | Bailon et al. 2010      |
| 'Oriental viper'         | A likely non-monophyletic group of 'Oriental vipers'; genera Daboia, Montivipera, Macrovipera | 2.5     | 2.5     | Morocco        | Ahl al Oughlam (near Casablanca)      | 33.5931 | -7.6164 |                                                                                                                                                                                                                                      | Böhme and Ilg 2003      |
| 'Oriental viper'         | A likely non-monophyletic group of 'Oriental vipers'; genera Daboia, Montivipera, Macrovipera | 6.8     | 7.7     | Hungary        | Tardosbanya 3                         | 47.6667 | 18.45   |                                                                                                                                                                                                                                      | Venczel 1998            |
| 'Oriental viper'         | A likely non-monophyletic group of 'Oriental vipers'; genera Daboia, Montivipera, Macrovipera | 8.1     | 8.8     | Ukraine        | Novoelizavetovka 2+3, lower layer     | 47.15   | 30.4055 |                                                                                                                                                                                                                                      | Zerova 1993             |

| Fossil           | Phylogenetic affinity                                                                         | Min age | Max age | Country | Locality                          | Lat     | Long    | Notes                                                                                                                                                    | Reference              |
|------------------|-----------------------------------------------------------------------------------------------|---------|---------|---------|-----------------------------------|---------|---------|----------------------------------------------------------------------------------------------------------------------------------------------------------|------------------------|
| 'Oriental viper' | A likely non-monophyletic group of 'Oriental vipers'; genera Daboia, Montivipera, Macrovipera | 11      | 12      | Russia  | Togay, Olkhon Island, Baykal Lake | 53.14   | 107.36  | The marked shortness of the vertebra, the strongly depressed condition of the neural arch, and the relatively large size point to the 'Oriental complex' | Rage and Danilov 2008  |
| 'Oriental viper' | A likely non-monophyletic group of 'Oriental vipers'; genera Daboia, Montivipera, Macrovipera | 12      | 13      | France  | Isle d'Abeau                      | 45.6199 | 5.2243  |                                                                                                                                                          | Szyndlar and Rage 2002 |
| 'Oriental viper' | A likely non-monophyletic group of 'Oriental vipers'; genera Daboia, Montivipera, Macrovipera | 13.7    | 14.6    | Germany | Petersbuch 39                     | 48.9779 | 11.1909 |                                                                                                                                                          | Szyndlar and Rage 2002 |
| 'Oriental viper' | A likely non-monophyletic group of 'Oriental vipers'; genera Daboia, Montivipera, Macrovipera | 13.5    | 14.5    | Russia  | Belomechetskaya                   | 44.4    | 41.9333 |                                                                                                                                                          | Szyndlar and Rage 2002 |
| 'Oriental viper' | A likely non-monophyletic group of 'Oriental vipers'; genera Daboia, Montivipera, Macrovipera | 14.8    | 14.8    | Germany | Griesbeckerzell 1a                | 48.4468 | 11.0543 |                                                                                                                                                          | Ivanov and Bohme 2011  |
| 'Oriental viper' | A likely non-monophyletic group of 'Oriental vipers'; genera Daboia, Montivipera, Macrovipera | 14.9    | 14.9    | Germany | Edelbeuren-Maurerkopf             | 48.0962 | 10.0311 |                                                                                                                                                          | Szyndlar and Rage 2002 |
| 'Oriental viper' | A likely non-monophyletic group of 'Oriental vipers'; genera Daboia, Montivipera, Macrovipera | 14      | 17.5    | France  | Vieux Collonges                   | 45.75   | 4.85    |                                                                                                                                                          | Ivanov 2000            |
| 'Oriental viper' | A likely non-monophyletic group of 'Oriental vipers'; genera Daboia, Montivipera, Macrovipera | 15      | 15      | Germany | Griesbeckerzell 1b                | 48.4468 | 11.0543 |                                                                                                                                                          | Szyndlar and Rage 2002 |
| 'Oriental viper' | A likely non-monophyletic group of 'Oriental vipers'; genera Daboia, Montivipera, Macrovipera | 16.27   | 16.47   | Germany | Sandelzhausen                     | 48.6283 | 11.796  |                                                                                                                                                          | Szyndlar 2009          |
| 'Oriental viper' | A likely non-monophyletic group of 'Oriental vipers'; genera Daboia, Montivipera, Macrovipera | 16.5    | 16.5    | Germany | Schiessen                         | 48.2974 | 10.2432 |                                                                                                                                                          | Szyndlar and Rage 2002 |

| <b>Fossil</b>    | <b>Phylogenetic affinity</b>                                                                  | <b>Min age</b> | <b>Max age</b> | <b>Country</b> | <b>Locality</b>                                 | <b>Lat</b> | <b>Long</b> | <b>Notes</b> | <b>Reference</b>                        |
|------------------|-----------------------------------------------------------------------------------------------|----------------|----------------|----------------|-------------------------------------------------|------------|-------------|--------------|-----------------------------------------|
| 'Oriental viper' | A likely non-monophyletic group of 'Oriental vipers'; genera Daboia, Montivipera, Macrovipera | 16.6           | 17.2           | Portugal       | Quinta das Pedreiras near Lumiar Lisboa         | 38.7167    | -9.1333     |              | Szyndlar 2000                           |
| 'Oriental viper' | A likely non-monophyletic group of 'Oriental vipers'; genera Daboia, Montivipera, Macrovipera | 17             | 17.5           | France         | Montréal-du-Gers                                | 43.9542    | 0.1971      |              | Szyndlar and Rage 2002                  |
| 'Oriental viper' | A likely non-monophyletic group of 'Oriental vipers'; genera Daboia, Montivipera, Macrovipera | 4.85           | 5.25           | Ukraine        | Kuchurgan                                       | 46.75      | 29.9833     |              | Szyndlar and Rage 2002                  |
| 'Oriental viper' | A likely non-monophyletic group of 'Oriental vipers'; genera Daboia, Montivipera, Macrovipera | 5.25           | 5.5            | Greece         | Maramena 1                                      | 41.1791    | 23.4711     |              | Szyndlar and Rage 2002                  |
| 'Oriental viper' | A likely non-monophyletic group of 'Oriental vipers'; genera Daboia, Montivipera, Macrovipera | 5.33           | 6              | Italy          | Brisighella Cava Monticino                      | 44.2167    | 11.7667     |              | Rook et al. 2015                        |
| 'Oriental viper' | A likely non-monophyletic group of 'Oriental vipers'; genera Daboia, Montivipera, Macrovipera | 7.6            | 8.7            | Ukraine        | Frunzovka 2                                     | 47.333     | 29.75       |              | Szyndlar 1991                           |
| 'Oriental viper' | A likely non-monophyletic group of 'Oriental vipers'; genera Daboia, Montivipera, Macrovipera | 8              | 9              | Georgia        | Rustavi                                         | 41.5261    | 45.0353     |              | Szyndlar and Rage 2002                  |
| Vipera ukrainica | A likely non-monophyletic group of 'Oriental vipers'; genera Daboia, Montivipera, Macrovipera | 11.04          | 12.014         | Ukraine        | Gritsev (Khmelnitsk area, Shepetovski district) | 49.975     | 27.16       |              | Szyndlar and Rage 2002                  |
| Vipera sarmatica | A likely non-monophyletic group of 'Oriental vipers'; genera Daboia, Montivipera, Macrovipera | 9.5            | 9.9            | Moldova        | Kalfa                                           | 46.9042    | 29.3753     |              | Szyndlar 1991<br>Szyndlar and Rage 2002 |
| Vipera ammodytes | V. ammodytes                                                                                  | 0.005          | 0.127          | Serbia         | Smolucka Cave, near Novi Pazar                  | 43.0517    | 20.3681     |              | Böhme and Ilg 2003                      |



| <b>Fossil</b>    | <b>Phylogenetic affinity</b> | <b>Min age</b> | <b>Max age</b> | <b>Country</b> | <b>Locality</b>               | <b>Lat</b> | <b>Long</b> | <b>Notes</b> | <b>Reference</b>   |
|------------------|------------------------------|----------------|----------------|----------------|-------------------------------|------------|-------------|--------------|--------------------|
| Vipera ammodytes | V. ammodytes                 | 0.127          | 0.7            | Greece         | Tourkobounia 2                | 37.99      | 23.49       |              | Böhme and Ilg 2003 |
| Vipera ammodytes | V. ammodytes                 | 0.7            | 1.64           | Czech Republic | Stranska Skala Hill near Brno | 49.2       | 16.6333     |              | Böhme and Ilg 2003 |
| Vipera ammodytes | V. ammodytes                 | 0.78           | 1.8            | Austria        | Bad Deutsch-Altenburg 2C1     | 48.1333    | 16.9        |              | Böhme and Ilg 2003 |
| Vipera ammodytes | V. ammodytes                 | 1              | 1.8            | Italy          | Pietrafitta (Umbria)          | 43         | 12.2        |              | Böhme and Ilg 2003 |
| Vipera ammodytes | V. ammodytes                 | 2.6            | 3.6            | Poland         | Rebielice Krolewskie 1A       | 51         | 18.8667     |              | Böhme and Ilg 2003 |
| Vipera ammodytes | V. ammodytes                 | 2.8            | 3.6            | Poland         | Rebielice Krolewskie 2        | 51         | 18.8667     |              | Böhme and Ilg 2003 |
| Vipera ammodytes | V. ammodytes                 | 3.6            | 4.2            | Poland         | Weze 1                        | 52.35      | 22.15       |              | Böhme and Ilg 2003 |
| Vipera ammodytes | V. ammodytes                 | 5              | 5.33           | Hungary        | Osztramos 1C                  | 48.525     | 20.7583     |              | Böhme and Ilg 2003 |
| Vipera aspis     | Vipera aspis                 | 0              | 0.01           | Italy          | Grotta dell'Edera, Aurisina   | 45.7475    | 13.6786     |              | Böhme and Ilg 2003 |
| Vipera aspis     | Vipera aspis                 | 0              | 0.05           | Italy          | San Vito Lo Capo K22, Sicily  | 38.2       | 12.75       |              | Böhme and Ilg 2003 |

| <b>Fossil</b> | <b>Phylogenetic affinity</b> | <b>Min age</b> | <b>Max age</b> | <b>Country</b> | <b>Locality</b>                                  | <b>Lat</b> | <b>Long</b> | <b>Notes</b> | <b>Reference</b>   |
|---------------|------------------------------|----------------|----------------|----------------|--------------------------------------------------|------------|-------------|--------------|--------------------|
| Vipera aspis  | Vipera aspis                 | 0.03           | 0.038          | Spain          | Teixoneres II Cave                               | 41.8       | 1.9         |              | Böhme and Ilg 2003 |
| Vipera aspis  | Vipera aspis                 | 0.031          | 0.038          | Italy          | Grotta Generosa, San Fedele Intelvi, Como        | 45.93      | 9.02        |              | Böhme and Ilg 2003 |
| Vipera aspis  | Vipera aspis                 | 0.04           | 0.07           | Spain          | Abric Romani near Capellades, 45 km NW Barcelona | 41.5328    | 1.6881      |              | Böhme and Ilg 2003 |
| Vipera aspis  | Vipera aspis                 | 0              | 0.127          | Italy          | Gabrovizza                                       | 45.7264    | 13.7294     |              | Böhme and Ilg 2003 |
| Vipera aspis  | Vipera aspis                 | 0.01           | 0.127          | France         | Cantet Cave, Espeche, Hautes Pyrenees            | 43.05      | 0.3         |              | Böhme and Ilg 2003 |
| Vipera aspis  | Vipera aspis                 | 0.08           | 0.127          | France         | Artenac, Charente                                | 45.85      | 0.3333      |              | Böhme and Ilg 2003 |
| Vipera aspis  | Vipera aspis                 | 0.1            | 0.11           | Italy          | Valdemino Cave, 26-27 (Borgio Verezzi, Liguria)  | 44.1633    | 12.4523     |              | Böhme and Ilg 2003 |
| Vipera aspis  | Vipera aspis                 | 0.12           | 0.2            | France         | Lazaret C, Alpes Maritimes                       |            |             |              | Böhme and Ilg 2003 |
| Vipera aspis  | Vipera aspis                 | 0.4            | 0.4            | Spain          | Gran Dolina TD 10, Atapuerca, Burgos             | 42.34      | -3.44       |              | Böhme and Ilg 2003 |
| Vipera aspis  | Vipera aspis                 | 0.127          | 0.7            | France         | Montousse 4, Hautes Pyrenees                     | 43.0667    | 0.4167      |              | Böhme and Ilg 2003 |

| <b>Fossil</b> | <b>Phylogenetic affinity</b> | <b>Min age</b> | <b>Max age</b> | <b>Country</b> | <b>Locality</b>                                           | <b>Lat</b> | <b>Long</b> | <b>Notes</b> | <b>Reference</b>   |
|---------------|------------------------------|----------------|----------------|----------------|-----------------------------------------------------------|------------|-------------|--------------|--------------------|
| Vipera aspis  | Vipera aspis                 | 0.2            | 0.7            | Italy          | Riparo di Visogliano                                      | 45.78      | 13.65       |              | Böhme and Ilg 2003 |
| Vipera aspis  | Vipera aspis                 | 0.126          | 0.781          | Spain          | Cova d'Olopte (Cova B), Isovol, Cerdanya                  | 42.3866    | 1.493       |              | Böhme and Ilg 2003 |
| Vipera aspis  | Vipera aspis                 | 0.4            | 0.9            | Spain          | Gran Dolina, Atapuerca, Burgos                            | 42.34      | -3.44       |              | Böhme and Ilg 2003 |
| Vipera aspis  | Vipera aspis                 | 0.7            | 0.7            | Italy          | Valdemino Cave, 20-24 (Borgio Verezzi, Liguria)           | 44.1633    | 12.4523     |              | Böhme and Ilg 2003 |
| Vipera aspis  | Vipera aspis                 | 0.85           | 0.85           | Spain          | Gran Dolina TD 6-1+TD 6-2, Atapuerca, Burgos              | 42.34      | -3.44       |              | Böhme and Ilg 2003 |
| Vipera aspis  | Vipera aspis                 | 0.85           | 0.9            | Spain          | Gran Dolina TD 6-3, Atapuerca, Burgos                     | 42.34      | -3.44       |              | Böhme and Ilg 2003 |
| Vipera aspis  | Vipera aspis                 | 0.012          | 1.806          | Spain          | L'Escala, Cala Montgo, Girona                             | 41.95      | 3.2         |              | Böhme and Ilg 2003 |
| Vipera aspis  | Vipera aspis                 | 0.7            | 1.64           | Italy          | Cava Dell'Erba Apricena, Foggia                           | 41.45      | 15.5667     |              | Böhme and Ilg 2003 |
| Vipera aspis  | Vipera aspis                 | 0.781          | 1.806          | Spain          | Bagur-2 (B-2), Begur, Girona                              | 41.95      | 3.2167      |              | Böhme and Ilg 2003 |
| Vipera aspis  | Vipera aspis                 | 1.3            | 1.7            | Italy          | Pirro Nord (Cava dell'Erba, Cava Pirro), Apricena, Apulia | 41.8019    | 15.3847     |              | Böhme and Ilg 2003 |

| Fossil             | Phylogenetic affinity                                                                              | Min age | Max age | Country | Locality                                  | Lat     | Long    | Notes                                                                         | Reference              |
|--------------------|----------------------------------------------------------------------------------------------------|---------|---------|---------|-------------------------------------------|---------|---------|-------------------------------------------------------------------------------|------------------------|
| Vipera aspis       | Vipera aspis                                                                                       | 1.8     | 1.9     | Spain   | Casablanca 1 (ACB-1), Almenara, Castellon | 39.75   | -0.2167 |                                                                               | Böhme and Ilg 2003     |
| Vipera aspis       | Vipera aspis                                                                                       | 1.9     | 2       | France  | Montousse 5, Hautes Pyrenees              | 43.0667 | 0.4167  |                                                                               | Böhme and Ilg 2003     |
| Vipera aspis       | Vipera aspis                                                                                       | 2       | 3       | Spain   | Zujar, Andalucia                          | 37.54   | -2.8434 |                                                                               | Böhme and Ilg 2003     |
| Vipera aspis       | Vipera aspis                                                                                       | 2.9     | 3       | France  | Mas Genegals, Herault                     | 42.85   | 2.8     |                                                                               | Böhme and Ilg 2003     |
| Vipera natiensis   | sister to Vipera aspis                                                                             | 3.6     | 5.3     | Spain   | Punta Nati near Ciutadella, Minorca       | 40.0506 | 3.8257  | The vertebrae of Vipera natiensis appear to be close to those of Vipera aspis | Bailon et al. 2002     |
| Vipera natiensis   | sister to Vipera aspis                                                                             | 5       | 5.33    | Spain   | Calo d'en Rafelino, Manacor, Mallorca     | 39.5566 | 3.3647  | The vertebrae of Vipera natiensis appear to be close to those of Vipera aspis | Bailon et al. 2002     |
| Vipera aspis group | A non-monophyletic group of: V. aspis, V. latastei, V. monticola, V. ammodytes, V. transcaucasiana | 9.9     | 10.3    | Hungary | Rudabanya                                 | 48.3833 | 20.6333 |                                                                               | Szyndlar and Rage 2002 |
| Vipera aspis group | A non-monophyletic group of: V. aspis, V. latastei, V. monticola, V. ammodytes, V. transcaucasiana | 11.2    | 11.4    | Hungary | Felsotarkany                              | 47.9667 | 20.4167 |                                                                               | Venczel 2011           |
| Vipera aspis group | A non-monophyletic group of: V. aspis, V. latastei, V. monticola, V. ammodytes, V. transcaucasiana | 11.6    | 11.8    | Hungary | Felsotarkany                              | 47.9566 | 20.3937 |                                                                               | Venczel 2011           |
| Vipera aspis group | A non-monophyletic group of: V. aspis, V. latastei, V. monticola, V. ammodytes, V. transcaucasiana | 12.1    | 13.1    | France  | La-Grive-Saint-Alban (M+L7), Ilserre      | 45.58   | 5.26    |                                                                               | Szyndlar and Rage 2002 |

| Fossil             | Phylogenetic affinity                                                                                                                     | Min age | Max age | Country        | Locality                                    | Lat     | Long    | Notes                                                                                                                                                                                                   | Reference              |
|--------------------|-------------------------------------------------------------------------------------------------------------------------------------------|---------|---------|----------------|---------------------------------------------|---------|---------|---------------------------------------------------------------------------------------------------------------------------------------------------------------------------------------------------------|------------------------|
| Vipera aspis group | A non-monophyletic group of: <i>V. aspis</i> , <i>V. latastei</i> , <i>V. monticola</i> , <i>V. ammodytes</i> , <i>V. transcaucasiana</i> | 13      | 14      | Romania        | Subpiatraf 2/1R, Bihor District             | 47      | 22.3    |                                                                                                                                                                                                         | Venczel 2011           |
| Vipera aspis group | A non-monophyletic group of: <i>V. aspis</i> , <i>V. latastei</i> , <i>V. monticola</i> , <i>V. ammodytes</i> , <i>V. transcaucasiana</i> | 13.5    | 13.7    | Slovakia       | Devinska Nova Ves - Bonanza                 | 48.0167 | 16.9333 |                                                                                                                                                                                                         | Ivanov 1998            |
| Vipera aspis group | A non-monophyletic group of: <i>V. aspis</i> , <i>V. latastei</i> , <i>V. monticola</i> , <i>V. ammodytes</i> , <i>V. transcaucasiana</i> | 14      | 17.5    | France         | Vieux Collonges                             | 45.75   | 4.85    | The neural spine is not so extremely low as it is in case of representatives of the complex 'berus', therefore, it is assumed that these vertebrae belong to the representatives of the complex 'aspis' | Ivanov 2000            |
| Vipera aspis group | A non-monophyletic group of: <i>V. aspis</i> , <i>V. latastei</i> , <i>V. monticola</i> , <i>V. ammodytes</i> , <i>V. transcaucasiana</i> | 14.8    | 17      | Germany        | Rothenstein 1/13                            | 48.967  | 11.059  |                                                                                                                                                                                                         | Szyndlar 2009          |
| Vipera aspis group | A non-monophyletic group of: <i>V. aspis</i> , <i>V. latastei</i> , <i>V. monticola</i> , <i>V. ammodytes</i> , <i>V. transcaucasiana</i> | 17      | 17.5    | France         | Bezian, La Romieu, Gers                     | 44.2    | 9       |                                                                                                                                                                                                         | Szyndlar and Rage 2002 |
| Vipera aspis group | A non-monophyletic group of: <i>V. aspis</i> , <i>V. latastei</i> , <i>V. monticola</i> , <i>V. ammodytes</i> , <i>V. transcaucasiana</i> | 17.6    | 17.6    | Austria        | Oberdorf N Voitsberg, Opencast Mine (O3+O4) | 47.0667 | 15.1167 |                                                                                                                                                                                                         | Szyndlar and Rage 2002 |
| Vipera aspis group | A non-monophyletic group of: <i>V. aspis</i> , <i>V. latastei</i> , <i>V. monticola</i> , <i>V. ammodytes</i> , <i>V. transcaucasiana</i> | 17.3    | 18      | France         | Beon 1                                      | 43.95   | 0.2     | The vertebrae are not elongate, which rules out a referral to the 'berus complex'. The overall proportions are consistent with those in the 'Vipera aspis complex'.                                     | Rage and Bailon 2006   |
| Vipera aspis group | A non-monophyletic group of: <i>V. aspis</i> , <i>V. latastei</i> , <i>V. monticola</i> , <i>V. ammodytes</i> , <i>V. transcaucasiana</i> | 17.5    | 18      | France         | Artenay (Loiret)                            | 48.1    | 1.9     |                                                                                                                                                                                                         | Szyndlar and Rage 2002 |
| Vipera aspis group | A non-monophyletic group of: <i>V. aspis</i> , <i>V. latastei</i> , <i>V. monticola</i> , <i>V. ammodytes</i> , <i>V. transcaucasiana</i> | 17.5    | 20      | Spain          | Agramon                                     | 38.4167 | -1.6333 |                                                                                                                                                                                                         | Szyndlar and Rage 2002 |
| Vipera aspis group | A non-monophyletic group of: <i>V. aspis</i> , <i>V. latastei</i> , <i>V. monticola</i> , <i>V. ammodytes</i> , <i>V. transcaucasiana</i> | 20      | 20      | Czech Republic | Merkur North, opencast mine, Ahnikov        | 50.45   | 13.4333 | The vertebrae are small with low ratio $cl/naw$ ; therefore, they were assigned to the 'Vipera aspis complex'                                                                                           | Ivanov 2002            |

| Fossil             | Phylogenetic affinity                                                                                                                     | Min age | Max age | Country | Locality                                                       | Lat     | Long    | Notes                                                                                                       | Reference               |
|--------------------|-------------------------------------------------------------------------------------------------------------------------------------------|---------|---------|---------|----------------------------------------------------------------|---------|---------|-------------------------------------------------------------------------------------------------------------|-------------------------|
| Vipera aspis group | A non-monophyletic group of: <i>V. aspis</i> , <i>V. latastei</i> , <i>V. monticola</i> , <i>V. ammodytes</i> , <i>V. transcaucasiana</i> | 20.5    | 21      | France  | Laugnac (Lot-et-Garonne)                                       | 44.247  | 0.4502  |                                                                                                             | Szyndlar and Rage 2002  |
| Vipera aspis group | A non-monophyletic group of: <i>V. aspis</i> , <i>V. latastei</i> , <i>V. monticola</i> , <i>V. ammodytes</i> , <i>V. transcaucasiana</i> | 21      | 22      | France  | Saint-Gerand-le-Puy, Allier                                    | 46.2581 | 3.512   |                                                                                                             | Szyndlar and Rage 2002  |
| Vipera aspis group | A non-monophyletic group of: <i>V. aspis</i> , <i>V. latastei</i> , <i>V. monticola</i> , <i>V. ammodytes</i> , <i>V. transcaucasiana</i> | 4.85    | 5.23    | Poland  | Podlesice                                                      | 50.5667 | 19.5333 |                                                                                                             | Szyndlar and Rage 2002  |
| Vipera aspis group | A non-monophyletic group of: <i>V. aspis</i> , <i>V. latastei</i> , <i>V. monticola</i> , <i>V. ammodytes</i> , <i>V. transcaucasiana</i> | 5       | 6       | Italy   | Gargano                                                        | 41.8    | 15.4    | The general shape of the vertebral body and hypapophysis indicate the presence of the <i>V. aspis</i> group | Delfino and Bailon 2000 |
| Vipera aspis group | A non-monophyletic group of: <i>V. aspis</i> , <i>V. latastei</i> , <i>V. monticola</i> , <i>V. ammodytes</i> , <i>V. transcaucasiana</i> | 5.35    | 6.15    | Hungary | Polgardi                                                       | 47.05   | 18.3    |                                                                                                             | Szyndlar 1991           |
| Vipera aspis group | A non-monophyletic group of: <i>V. aspis</i> , <i>V. latastei</i> , <i>V. monticola</i> , <i>V. ammodytes</i> , <i>V. transcaucasiana</i> | 5.33    | 6.2     | Hungary | Polgardi                                                       | 47.05   | 18.3    |                                                                                                             | Szyndlar 1991           |
| Vipera aspis group | A non-monophyletic group of: <i>V. aspis</i> , <i>V. latastei</i> , <i>V. monticola</i> , <i>V. ammodytes</i> , <i>V. transcaucasiana</i> | 8.7     | 9.2     | Ukraine | Krivoj Rog                                                     | 47.9167 | 33.35   |                                                                                                             | Szyndlar and Rage 2002  |
| Vipera meotica     | A non-monophyletic group of: <i>V. aspis</i> , <i>V. latastei</i> , <i>V. monticola</i> , <i>V. ammodytes</i> , <i>V. transcaucasiana</i> | 5.332   | 7.246   | Ukraine | Orehovka                                                       | 48.2867 | 39.2038 | A member of the aspis complex                                                                               | Szyndlar and Rage 2002  |
| Vipera meotica     | A non-monophyletic group of: <i>V. aspis</i> , <i>V. latastei</i> , <i>V. monticola</i> , <i>V. ammodytes</i> , <i>V. transcaucasiana</i> | 7       | 7.6     | Ukraine | Cherevichnoje lower level                                      | 46.6333 | 30.6167 | A member of the aspis complex                                                                               | Szyndlar and Rage 2002  |
| Vipera berus       | <i>Vipera berus</i>                                                                                                                       | 0.003   | 0.007   | England | Creag nan Uamh Caves, Badger Cave, Assynt, north-west Scotland | 58.1084 | -4.9391 |                                                                                                             | Böhme and Ilg 2003      |

| <b>Fossil</b> | <b>Phylogenetic affinity</b> | <b>Min age</b> | <b>Max age</b> | <b>Country</b> | <b>Locality</b>                                              | <b>Lat</b> | <b>Long</b> | <b>Notes</b> | <b>Reference</b>     |
|---------------|------------------------------|----------------|----------------|----------------|--------------------------------------------------------------|------------|-------------|--------------|----------------------|
| Vipera berus  | Vipera berus                 | 0.001          | 0.01           | Germany        | Gamsenberg (Vorderer) near Oppurg, Thuringia                 | 50.7167    | 11.65       |              | Böhme and Ilg 2003   |
| Vipera berus  | Vipera berus                 | 0.004          | 0.008          | England        | Creag nan Uamh Caves, Bone Cave, Assynt, north-west Scotland | 58.1084    | -4.9391     |              | Böhme and Ilg 2003   |
| Vipera berus  | Vipera berus                 | 0.005          | 0.012          | England        | Torbryon Caves, Broken Cavern, Devon                         | 50.4944    | -3.6706     |              | Böhme and Ilg 2003   |
| Vipera berus  | Vipera berus                 | 0.01           | 0.01           | England        | Cow Cave, Chudleigh, Devonshire                              | 50.6063    | -3.62       |              | Böhme and Ilg 2003   |
| Vipera berus  | Vipera berus                 | 0.01           | 0.1            | Germany        | Saalfeld Roter Berg, Thuringia                               | 50.65      | 11.3667     |              | Böhme and Ilg 2003   |
| Vipera berus  | Vipera berus                 | 0.005          | 0.127          | Germany        | Dietfurt near Sigmaringen                                    | 48.0667    | 9.1333      |              | Böhme and Ilg 2003   |
| Vipera berus  | Vipera berus                 | 0.01           | 0.127          | Germany        | Burgtonna, Deckschichten                                     | 51.0667    | 10.7333     |              | Böhme and Ilg 2003   |
| Vipera berus  | Vipera berus                 | 0.075          | 0.085          | France         | Bois Roche Cave 1a, near Cognac, Charente                    | 45.7       | -0.3333     |              | Blain and Villa 2006 |
| Vipera berus  | Vipera berus                 | 0.12           | 0.2            | France         | Lazaret C, Alpes Maritimes                                   |            |             |              | Böhme and Ilg 2003   |
| Vipera berus  | Vipera berus                 | 0.007          | 0.4            | England        | Kent's Cavern (Wolf Den), Wellswood, 2km E Torquay, Devon    | 50.4682    | -3.503      |              | Böhme and Ilg 2003   |

| <b>Fossil</b>      | <b>Phylogenetic affinity</b>                                                 | <b>Min age</b> | <b>Max age</b> | <b>Country</b> | <b>Locality</b>                                     | <b>Lat</b> | <b>Long</b> | <b>Notes</b>                                                                                            | <b>Reference</b>                                            |
|--------------------|------------------------------------------------------------------------------|----------------|----------------|----------------|-----------------------------------------------------|------------|-------------|---------------------------------------------------------------------------------------------------------|-------------------------------------------------------------|
| Vipera berus       | Vipera berus                                                                 | 0.374          | 0.424          | England        | East Farm, Barnham, Suffolk                         | 52.3667    | 52.3667     |                                                                                                         | Böhme and Ilg 2003                                          |
| Vipera berus       | Vipera berus                                                                 | 0.127          | 0.7            | Austria        | St. Margarethen, near Hainburg                      | 47.8       | 16.6        |                                                                                                         | Böhme and Ilg 2003                                          |
| Vipera berus       | Vipera berus                                                                 | 0.7            | 0.7            | Poland         | Kozi Grzbiet                                        | 50.7964    | 15.3844     |                                                                                                         | Böhme and Ilg 2003                                          |
| Vipera berus       | Vipera berus                                                                 | 0.7            | 1.64           | Czech Republic | Mala Dohoda Quarry, Moravian Karst Area             |            |             |                                                                                                         | Böhme and Ilg 2003                                          |
| Vipera berus       | Vipera berus                                                                 | 0.78           | 1.8            | Poland         | Jaskinia Zabia                                      |            |             |                                                                                                         | Böhme and Ilg 2003                                          |
| Vipera berus       | Vipera berus                                                                 | 2              | 2.2            | Poland         | Kadzielnia                                          | 50.2036    | 20.9278     |                                                                                                         | Böhme and Ilg 2003                                          |
| Vipera berus group | A clade of: <i>V. berus</i> , <i>ursinii</i> , and all other related species | 1.9            | 2              | France         | Montousse 5, Hautes Pyrenees                        | 43.0667    | 0.4167      | Previous understanding of the <i>V. berus</i> group included also <i>V. ursinii</i> and related species | Groombridge 1986<br>Szyndlar 1991<br>Szyndlar and Rage 2002 |
| Vipera berus group | A clade of: <i>V. berus</i> , <i>ursinii</i> , and all other related species | 2.6            | 3.6            | Greece         | Tourkobounia 1                                      | 37.99      | 23.49       | Previous understanding of the <i>V. berus</i> group included also <i>V. ursinii</i> and related species | Groombridge 1986<br>Szyndlar 1991<br>Szyndlar and Rage 2002 |
| Vipera berus group | A clade of: <i>V. berus</i> , <i>ursinii</i> , and all other related species | 3.1            | 3.3            | Spain          | Las Higuieruelas, Alcolea de Calatrava, Ciudad Real | 38.9883    | -4.0857     | Previous understanding of the <i>V. berus</i> group included also <i>V. ursinii</i> and related species | Groombridge 1986<br>Szyndlar 1991<br>Szyndlar and Rage 2002 |
| Vipera berus group | A clade of: <i>V. berus</i> , <i>ursinii</i> , and all other related species | 5              | 5.33           | Hungary        | Osztramos 1C                                        | 48.525     | 20.7583     | Previous understanding of the <i>V. berus</i> group included also <i>V. ursinii</i> and related species | Groombridge 1986<br>Szyndlar 1991<br>Szyndlar and Rage 2002 |



| <b>Fossil</b>      | <b>Phylogenetic affinity</b>                                                 | <b>Min age</b> | <b>Max age</b> | <b>Country</b> | <b>Locality</b>                                                    | <b>Lat</b> | <b>Long</b> | <b>Notes</b>                                                                                            | <b>Reference</b>                                            |
|--------------------|------------------------------------------------------------------------------|----------------|----------------|----------------|--------------------------------------------------------------------|------------|-------------|---------------------------------------------------------------------------------------------------------|-------------------------------------------------------------|
| Vipera berus group | A clade of: <i>V. berus</i> , <i>ursinii</i> , and all other related species | 5.5            | 7              | Ukraine        | Andreevka                                                          | 48.0167    | 37.05       | Previous understanding of the <i>V. berus</i> group included also <i>V. ursinii</i> and related species | Groombridge 1986<br>Szyndlar 1991<br>Szyndlar and Rage 2002 |
| Vipera berus group | A clade of: <i>V. berus</i> , <i>ursinii</i> , and all other related species | 7.28           | 7.38           | Ukraine        | Novaya Emetovka 2 (Kostev ravine)                                  | 46.7333    | 30.5333     | Previous understanding of the <i>V. berus</i> group included also <i>V. ursinii</i> and related species | Groombridge 1986<br>Szyndlar 1991<br>Szyndlar and Rage 2002 |
| Vipera berus group | A clade of: <i>V. berus</i> , <i>ursinii</i> , and all other related species | 7.6            | 8.7            | Ukraine        | Frunzovka 2                                                        | 47.333     | 29.75       | Previous understanding of the <i>V. berus</i> group included also <i>V. ursinii</i> and related species | Groombridge 1986<br>Szyndlar 1991<br>Szyndlar and Rage 2002 |
| Vipera berus group | A clade of: <i>V. berus</i> , <i>ursinii</i> , and all other related species | 8.1            | 8.8            | Ukraine        | Novoelizavetovka 2+3, lower layer                                  | 47.15      | 30.4055     | Previous understanding of the <i>V. berus</i> group included also <i>V. ursinii</i> and related species | Groombridge 1986<br>Szyndlar 1991<br>Szyndlar and Rage 2002 |
| Vipera latastei    | <i>Vipera latastei</i>                                                       | 0.013          | 0.015          | England        | Gorham's Cave IIIa, Gibraltar Peninsula                            | 36.1203    | -5.3419     |                                                                                                         | Böhme and Ilg 2003                                          |
| Vipera latastei    | <i>Vipera latastei</i>                                                       | 0.017          | 0.023          | England        | Gorham's Cave IIIb, Gibraltar Peninsula                            | 36.1203    | -5.3419     |                                                                                                         | Böhme and Ilg 2003                                          |
| Vipera latastei    | <i>Vipera latastei</i>                                                       | 0.027          | 0.039          | England        | Gorham's Cave IV, Gibraltar Peninsula                              | 36.1203    | -5.3419     |                                                                                                         | Böhme and Ilg 2003                                          |
| Vipera latastei    | <i>Vipera latastei</i>                                                       | 0.021          | 0.057          | Spain          | Higueral de Valleja Cave                                           | 36.75      | -5.81       |                                                                                                         | Böhme and Ilg 2003                                          |
| Vipera latastei    | <i>Vipera latastei</i>                                                       | 0.047          | 0.048          | Spain          | Cova dels Xaragalls layer C4, Vimbodi-Poblet, Tarragona, Catalonia | 41.008     | 1.0488      |                                                                                                         | Böhme and Ilg 2003                                          |
| Vipera latastei    | <i>Vipera latastei</i>                                                       | 0.054          | 0.055          | Spain          | Cova dels Xaragalls layer C6, Vimbodi-Poblet, Tarragona, Catalonia | 41.008     | 1.0488      |                                                                                                         | Böhme and Ilg 2003                                          |

| <b>Fossil</b>   | <b>Phylogenetic affinity</b> | <b>Min age</b> | <b>Max age</b> | <b>Country</b> | <b>Locality</b>                                             | <b>Lat</b> | <b>Long</b> | <b>Notes</b> | <b>Reference</b>   |
|-----------------|------------------------------|----------------|----------------|----------------|-------------------------------------------------------------|------------|-------------|--------------|--------------------|
| Vipera latastei | Vipera latastei              | 0.01           | 0.127          | Spain          | Cueva Hora (Darro, Granada)                                 | 37.35      | -3.3        |              | Böhme and Ilg 2003 |
| Vipera latastei | Vipera latastei              | 0.068          | 0.081          | Spain          | Cueva del Camino Secteur Sud, Pinilla del Valle, Madrid     | 40.9254    | -3.8063     |              | Böhme and Ilg 2003 |
| Vipera latastei | Vipera latastei              | 0.079          | 0.089          | Spain          | Hat, Jarama valley, San Martin de la Vega, 18 km SE Madrid  | 40.2616    | -3.5347     |              | Böhme and Ilg 2003 |
| Vipera latastei | Vipera latastei              | 0.083          | 0.099          | Spain          | Cueva del Camino Secteur Central, Pinilla del Valle, Madrid | 40.9254    | -3.8063     |              | Böhme and Ilg 2003 |
| Vipera latastei | Vipera latastei              | 0.084          | 0.1            | Spain          | Cueva del Camino Secteur Nord, Pinilla del Valle, Madrid    | 40.9254    | -3.8063     |              | Böhme and Ilg 2003 |
| Vipera latastei | Vipera latastei              | 0.25           | 0.35           | Spain          | Sima del Elefante TE18+TE19, Sierra de Atapuerca, Burgos    | 42.33      | -3.51       |              | Böhme and Ilg 2003 |
| Vipera latastei | Vipera latastei              | 0.011          | 0.7            | Spain          | Cueva del Agua, Iznalloz, Granada                           | 36.9333    | -1.9333     |              | Böhme and Ilg 2003 |
| Vipera latastei | Vipera latastei              | 0.4            | 0.4            | Spain          | Gran Dolina TD 10, Atapuerca, Burgos                        | 42.34      | -3.44       |              | Blain et al. 2008  |
| Vipera latastei | Vipera latastei              | 0.4            | 0.9            | Spain          | Gran Dolina (TD=Trinchera Dolina), Atapuerca, Burgos        | 42.34      | -3.44       |              | Blain et al. 2008  |
| Vipera latastei | Vipera latastei              | 1.1            | 1.1            | Spain          | Casablanca 3 (ACB-3), Almenara, Castellon                   | 39.75      | -0.2167     |              | Blain et al. 2007  |

| <b>Fossil</b>   | <b>Phylogenetic affinity</b> | <b>Min age</b> | <b>Max age</b> | <b>Country</b> | <b>Locality</b>                                            | <b>Lat</b> | <b>Long</b> | <b>Notes</b> | <b>Reference</b>       |
|-----------------|------------------------------|----------------|----------------|----------------|------------------------------------------------------------|------------|-------------|--------------|------------------------|
| Vipera latastei | Vipera latastei              | 1.1            | 1.2            | Spain          | Cueva de la Victoria-1 (CV-1), Carthagene, Murcia          | 37.6167    | -0.8667     |              | Böhme and Ilg 2003     |
| Vipera latastei | Vipera latastei              | 0.8            | 1.8            | Spain          | El Chaparral, Villaluenga del Rosario, Cadiz               | 36.6982    | -5.3888     |              | Böhme and Ilg 2003     |
| Vipera latastei | Vipera latastei              | 1.8            | 1.9            | Spain          | Casablanca 1 (ACB-1), Almenara, Castellon                  | 39.75      | -0.2167     |              | Böhme and Ilg 2003     |
| Vipera latastei | Vipera latastei              | 1.85           | 1.9            | Spain          | Vallirana (VA), Castelldefels, Massif de Garraf, Barcelone | 41.8333    | 1.9333      |              | Böhme and Ilg 2003     |
| Vipera latastei | Vipera latastei              | 2.3            | 2.35           | Spain          | Casablanca 4 (ACB-4), Almenara, Castellon                  | 39.75      | -0.2167     |              | Böhme and Ilg 2003     |
| Vipera ursinii  | Vipera ursinii               | 0.12           | 0.2            | France         | Lazaret C, Alpes Maritimes                                 |            |             |              | Böhme and Ilg 2003     |
| Vipera ursinii  | Vipera ursinii               | 0.13           | 0.38           | Russia         | Chernyi Yar-Nizhnee Zaimishche, Volgograd                  | 48.0606    | 46.1162     |              | Böhme and Ilg 2003     |
| Vipera ursinii  | Vipera ursinii               | 0.7            | 1.64           | Czech Republic | Stranska Skala Hill near Brno                              | 49.2       | 16.6333     |              | Böhme and Ilg 2003     |
| Vipera ursinii  | Vipera ursinii               | 2              | 2.2            | Ukraine        | Kotlovina, middle level                                    | 45.5       | 28.5667     |              | Szyndlar and Rage 2002 |
| Vipera ursinii  | Vipera ursinii               | 2.2            | 2.5            | Ukraine        | Tikhonovka 1 & 2                                           | 46.0167    | 33.7833     |              | Böhme and Ilg 2003     |

| Fossil             | Phylogenetic affinity | Min age | Max age | Country        | Locality                                                    | Lat     | Long    | Notes                                                                              | Reference                               |
|--------------------|-----------------------|---------|---------|----------------|-------------------------------------------------------------|---------|---------|------------------------------------------------------------------------------------|-----------------------------------------|
| Vipera antiqua     | Vipera                | 17      | 17.5    | Czech Republic | Dolnice near Cheb                                           | 50.0833 | 12.3833 | The oldest known member of the genus Vipera                                        | Szyndlar 1987<br>Szyndlar and Rage 2002 |
| Vipera antiqua     | Vipera                | 17.5    | 18      | Germany        | Petersbuch 2                                                | 48.9779 | 11.1909 | The oldest known member of the genus Vipera                                        | Szyndlar 1987<br>Szyndlar and Rage 2002 |
| Vipera antiqua     | Vipera                | 20.5    | 22      | Germany        | Hessler, Wiesbaden-Biebrich                                 | 50.25   | 7.75    | The oldest known member of the genus Vipera                                        | Szyndlar 1987<br>Szyndlar and Rage 2002 |
| Vipera antiqua     | Vipera                | 21.5    | 22.5    | Germany        | Mainz-Weisenau (quarry, Fp.19)                              | 49.9075 | 8.298   | The oldest known member of the genus Vipera                                        | Szyndlar 1987<br>Szyndlar and Rage 2002 |
| Vipera maghrebiana | Vipera                | 13      | 13.1    | Morocco        | Beni Mellal                                                 | 32.5    | -6.5    | This snake closely resembles smaller members of the genus Vipera (European vipers) | Szyndlar and Rage 2002                  |
| Vipera sp.         | Vipera                | 0.004   | 0.015   | Spain          | Valdavara-1 cave, Lugo                                      | 42.85   | -7.16   |                                                                                    | Böhme and Ilg 2003                      |
| Vipera sp.         | Vipera                | 0.017   | 0.037   | Spain          | El PortalĀn, entrance Cueva Mayor, Sierra Atapuerca, Burgos | 42.33   | -3.51   |                                                                                    | Böhme and Ilg 2003                      |
| Vipera sp.         | Vipera                | 0.031   | 0.039   | Spain          | Cueva del Conde, Santo Adriano, Asturias                    | 43.3167 | -5.9833 |                                                                                    | Böhme and Ilg 2003                      |
| Vipera sp.         | Vipera                | 0.039   | 0.04    | Spain          | Canyars in the town of GavĀ , 20 km W Barcelona             | 41.4161 | 2.231   |                                                                                    | Böhme and Ilg 2003                      |
| Vipera sp.         | Vipera                | 0.005   | 0.127   | Germany        | Malerfels near Gredinge, Nuremberg area                     | 49.0483 | 11.3614 |                                                                                    | Böhme and Ilg 2003                      |

| <b>Fossil</b> | <b>Phylogenetic affinity</b> | <b>Min age</b> | <b>Max age</b> | <b>Country</b> | <b>Locality</b>                                                                 | <b>Lat</b> | <b>Long</b> | <b>Notes</b> | <b>Reference</b>   |
|---------------|------------------------------|----------------|----------------|----------------|---------------------------------------------------------------------------------|------------|-------------|--------------|--------------------|
| Vipera sp.    | Vipera                       | 0.011          | 0.126          | Spain          | Cova del Gegant, Massif of Garraf, Sitges, Barcelona                            | 41.2333    | 1.7333      |              | Böhme and Ilg 2003 |
| Vipera sp.    | Vipera                       | 0.074          | 0.147          | Spain          | Cova del Rinoceront, eastern Garraf Massif, CanÀ Aymerich quarry, Castelldefels | 41.2736    | 1.9609      |              | Böhme and Ilg 2003 |
| Vipera sp.    | Vipera                       | 0              | 0.45           | Ukraine        | Ozyornoye-1 near Ozernoe, east bank of Jalpug Lake, Odessa Region               | 45.4       | 28.6667     |              | Böhme and Ilg 2003 |
| Vipera sp.    | Vipera                       | 0.39           | 0.41           | Turkey         | Emirkaya 2, 1.5 km south of Seydisehir                                          | 37.405     | 31.8346     |              | Böhme and Ilg 2003 |
| Vipera sp.    | Vipera                       | 0.127          | 0.7            | Croatia        | Dubci                                                                           |            |             |              | Böhme and Ilg 2003 |
| Vipera sp.    | Vipera                       | 0.475          | 0.51           | Russia         | Kuznetsovka left board of Podgornyi Buerak, Uvarovo rayon, Tambov oblast`       | 51.96      | 42.19       |              | Böhme and Ilg 2003 |
| Vipera sp.    | Vipera                       | 0.5            | 0.65           | Russia         | Koziy Ovrak                                                                     | 50.9       | 39.8        |              | Böhme and Ilg 2003 |
| Vipera sp.    | Vipera                       | 0.7            | 0.8            | Russia         | Ilyinka 2                                                                       | 52         | 42          |              | Böhme and Ilg 2003 |
| Vipera sp.    | Vipera                       | 0.01           | 1.64           | Germany        | Stuttgart Viadukt                                                               | 48.7667    | 9.1833      |              | Böhme and Ilg 2003 |
| Vipera sp.    | Vipera                       | 1              | 1.1            | Moldova        | Chishmikiioi                                                                    | 45.533     | 28.3888     |              | Böhme and Ilg 2003 |

| <b>Fossil</b> | <b>Phylogenetic affinity</b> | <b>Min age</b> | <b>Max age</b> | <b>Country</b> | <b>Locality</b>                                       | <b>Lat</b> | <b>Long</b> | <b>Notes</b> | <b>Reference</b>   |
|---------------|------------------------------|----------------|----------------|----------------|-------------------------------------------------------|------------|-------------|--------------|--------------------|
| Vipera sp.    | Vipera                       | 0.7            | 1.64           | France         | Mas Rambault near Montpellier                         | 43.5       | 3.6         |              | Böhme and Ilg 2003 |
| Vipera sp.    | Vipera                       | 1.06           | 1.38           | Spain          | Sima del Elefante TE9, Sierra de Atapuerca, Burgos    | 42.33      | -3.51       |              | Böhme and Ilg 2003 |
| Vipera sp.    | Vipera                       | 0.8            | 1.8            | Italy          | Monte Argentario (Miniera della Polveriera), Grosseto | 42.4065    | 11.1545     |              | Böhme and Ilg 2003 |
| Vipera sp.    | Vipera                       | 1.3            | 1.4            | Spain          | Sierra de Quibas, Abanilla, Murcia                    | 38.3       | -1.05       |              | Böhme and Ilg 2003 |
| Vipera sp.    | Vipera                       | 1.5            | 2.5            | Italy          | Monte Tuttavista Cava VI (3) - antica, Sardinia       | 40.3833    | 9.7         |              | Böhme and Ilg 2003 |
| Vipera sp.    | Vipera                       | 2.2            | 2.5            | Ukraine        | Bolshevik 2                                           | 50.45      | 30.44       |              | Böhme and Ilg 2003 |
| Vipera sp.    | Vipera                       | 2.5            | 2.6            | Spain          | Cova Bonica (CBo), Massif of Garraf, GavÀ , Barcelona | 41.38      | 1.93        |              | Böhme and Ilg 2003 |
| Vipera sp.    | Vipera                       | 2.6            | 2.7            | Ukraine        | Zhevakhova Gora                                       | 46.55      | 30.7333     |              | Böhme and Ilg 2003 |
| Vipera sp.    | Vipera                       | 2.5            | 3.5            | Moldova        | Novye Tanatary                                        | 46.7165    | 29.4165     |              | Böhme and Ilg 2003 |
| Vipera sp.    | Vipera                       | 2.588          | 3.6            | Italy          | Capo Mannu D1 Local Fauna (Mandriola), Sardinia       | 40.0409    | 8.3845      |              | Böhme and Ilg 2003 |

| <b>Fossil</b> | <b>Phylogenetic affinity</b> | <b>Min age</b> | <b>Max age</b> | <b>Country</b> | <b>Locality</b>                                           | <b>Lat</b> | <b>Long</b> | <b>Notes</b> | <b>Reference</b>    |
|---------------|------------------------------|----------------|----------------|----------------|-----------------------------------------------------------|------------|-------------|--------------|---------------------|
| Vipera sp.    | Vipera                       | 2.6            | 3.6            | Ukraine        | Vinogradovka                                              | 45.8333    | 29.3833     |              | Böhme and Ilg 2003  |
| Vipera sp.    | Vipera                       | 2.8            | 3.6            | Austria        | Bad Deutsch-Altenburg 20                                  | 48.1333    | 16.9        |              | Böhme and Ilg 2003  |
| Vipera sp.    | Vipera                       | 3.5            | 3.6            | Spain          | Layna, Province de Soria                                  | 41.1       | -2.3        |              | Böhme and Ilg 2003  |
| Vipera sp.    | Vipera                       | 3.6            | 4.2            | Moldova        | Musaid right bank of Big Salcha River, Vulkaneshty Region | 45.8206    | 28.505      |              | Böhme and Ilg 2003  |
| Vipera sp.    | Vipera                       | 3.6            | 5.3            | Spain          | Vilafant, Girona                                          | 42.2492    | 2.9378      |              | Böhme and Ilg 2003  |
| Vipera sp.    | Vipera                       | 4              | 7              | Spain          | Na Burguesa-1, Mallorca                                   | 39.5704    | 2.5579      |              | Böhme and Ilg 2003  |
| Vipera sp.    | Vipera                       | 5.5            | 7              | Italy          | Cava Passalacqua near Apricena                            | 41.8       | 15.4        |              | Böhme and Ilg 2003  |
| Vipera sp.    | Vipera                       | 6.8            | 7.7            | Hungary        | Tardosbanya 3                                             | 47.6667    | 18.45       |              | Venczel 1998        |
| Vipera sp.    | Vipera                       | 9.7            | 11.1           | Spain          | Hostalets de Pierola, Catalonia, Spain                    | 41.5349    | 1.7685      |              | Carmona et al. 2010 |
| Vipera sp.    | Vipera                       | 11.04          | 12.014         | Ukraine        | Gritsev (Khmelnitsk area, Shepetovski district)           | 49.975     | 27.16       |              | Szyndlar 1991       |

| Fossil            | Phylogenetic affinity                                | Min age | Max age | Country  | Locality                                 | Lat     | Long    | Notes                                                                                                                                                                                           | Reference              |
|-------------------|------------------------------------------------------|---------|---------|----------|------------------------------------------|---------|---------|-------------------------------------------------------------------------------------------------------------------------------------------------------------------------------------------------|------------------------|
| Vipera sp.        | Vipera                                               | 13.5    | 13.7    | Slovakia | Devinska Nova Ves - Bonanza              | 48.0167 | 16.9333 | Belongs to the 'European vipers' group of the uncertain complex                                                                                                                                 | Szyndlar 1991          |
| Vipera sp.        | Vipera                                               | 16.4    | 17.25   | Germany  | Randecker Maar                           | 48.5667 | 9.5333  |                                                                                                                                                                                                 | Szyndlar and Rage 2002 |
| Vipera sp.        | Vipera                                               | 17.75   | 17.8    | Germany  | Langenau 1                               | 48.5003 | 10.1219 |                                                                                                                                                                                                 | Szyndlar and Rage 2002 |
| Vipera sp.        | Vipera                                               | 20.43   | 23.03   | Italy    | Oschiri, Sardinia                        | 40.7222 | 9.0973  | The short vertebral centrum somewhat recalls the morphology of <i>V. aspis</i> , however, due to the scarcity of the material and its preservation, the identification is limited at genus rank | Delfino et al. 2011    |
| Vipera sensu lato | A clade of: Vipera, Daboia, Montivipera, Macrovipera | 12.75   | 13.25   | Germany  | Kleineisenbach                           | 48.3639 | 11.5988 | Could not be assigned to a genus                                                                                                                                                                | Szyndlar and Rage 2002 |
| Vipera sensu lato | A clade of: Vipera, Daboia, Montivipera, Macrovipera | 14      | 16      | France   | Pontigne-les-Buisseneaux, Maine-et-Loire | 47.54   | -0.0401 | Could not be assigned to a genus                                                                                                                                                                | Szyndlar and Rage 2002 |
| Vipera sensu lato | A clade of: Vipera, Daboia, Montivipera, Macrovipera | 17.75   | 17.8    | Germany  | Langenau 1                               | 48.5003 | 10.1219 | Could not be assigned to a genus                                                                                                                                                                | Szyndlar and Rage 2002 |
| Vipera sensu lato | A clade of: Vipera, Daboia, Montivipera, Macrovipera | 18      | 20      | Germany  | Stubersheim 3                            | 48.5947 | 9.9139  | Could not be assigned to a genus                                                                                                                                                                | Szyndlar and Rage 2002 |



**Supplementary Table S4.** Stem and crown age estimates (Ma) of the viperine genera based on the FBD calibration. *Eristicophis* and *Proatheris* are monotypic and hence do not have crown age estimates.

| <b>Genus</b>          | <b>Stem age</b> |                | <b>Crown age</b> |                |
|-----------------------|-----------------|----------------|------------------|----------------|
|                       | <b>Mean</b>     | <b>95% HPD</b> | <b>Mean</b>      | <b>95% HPD</b> |
| <i>Atheris</i>        | 27.7            | 24.2–31.4      | 13.4             | 10.8–16.2      |
| <i>Bitis</i>          | 27.7            | 24.2–31.4      | 23.5             | 20.3–26.8      |
| <i>Causus</i>         | 34.0            | 29.2–37.8      | 18.6             | 15.2–22.1      |
| <i>Cerastes</i>       | 28.9            | 25.1–32.8      | 15.3             | 11.6–19.1      |
| <i>Daboia</i>         | 20.2            | 17.9–22.6      | 16.1             | 13.6–18.8      |
| <i>Echis</i>          | 28.9            | 25.1–32.8      | 18.9             | 16.4–21.7      |
| <i>Eristicophis</i>   | 18.0            | 14.4–21.6      | na               | na             |
| <i>Macrovipera</i>    | 12.6            | 11.9–13.8      | 7.2              | 5.1–9.2        |
| <i>Montivipera</i>    | 12.6            | 11.9–13.8      | 7.3              | 6.3–8.4        |
| <i>Proatheris</i>     | 28.6            | 24.8–32.6      | na               | na             |
| <i>Pseudocerastes</i> | 18.0            | 14.4–21.6      | 12.0             | 8.6–15.2       |
| <i>Vipera</i>         | 20.2            | 17.9–22.6      | 13.4             | 11.5–15.4      |

**Supplementary Table S5.** Results of the biogeographic reconstructions using BioGeoBEARS. Statistics for the competing models and estimated parameter values are shown. The best models as identified by AICc are in bold.

| Input tree                                               | Model         | LnL            | No. of parameters | Dispersal rate (d) | Extinction rate (e) | Founder-event speciation (j) | AICc          | AIC_wt          |
|----------------------------------------------------------|---------------|----------------|-------------------|--------------------|---------------------|------------------------------|---------------|-----------------|
| Viperinae<br>(83 tips)                                   | DEC           | -86.53         | 2                 | 0.0045             | 1.00E-12            | -                            | 177.07        | 2.04E-06        |
|                                                          | <b>DEC+J</b>  | <b>-72.69</b>  | <b>3</b>          | <b>0.0013</b>      | <b>1.00E-12</b>     | <b>0.0310</b>                | <b>151.38</b> | <b>7.74E-01</b> |
|                                                          | DIVALIKE      | -87.25         | 2                 | 0.0067             | 1.00E-12            | -                            | 178.50        | 9.95E-07        |
|                                                          | DIVALIKE+J    | -74.02         | 3                 | 0.0018             | 1.00E-12            | 0.0339                       | 154.04        | 2.04E-01        |
|                                                          | BAYAREALIKE   | -115.79        | 2                 | 0.0025             | 3.41E-02            | -                            | 235.58        | 4.01E-19        |
|                                                          | BAYAREALIKE+J | -76.23         | 3                 | 0.0011             | 1.00E-07            | 0.0380                       | 158.47        | 2.23E-02        |
| Viperinae +<br>Azemiopinae +<br>Crotalinae<br>(282 tips) | DEC           | -151.86        | 2                 | 0.3044             | 1.00E-12            | -                            | 307.76        | 8.59E-03        |
|                                                          | <b>DEC+J</b>  | <b>-146.09</b> | <b>3</b>          | <b>0.1936</b>      | <b>1.00E-12</b>     | <b>0.0032</b>                | <b>298.26</b> | <b>9.91E-01</b> |
|                                                          | DIVALIKE      | -164.57        | 2                 | 0.4332             | 1.00E-12            | -                            | 333.19        | 2.58E-08        |
|                                                          | DIVALIKE+J    | -155.85        | 3                 | 0.2664             | 1.00E-12            | 0.0048                       | 317.79        | 5.72E-05        |
|                                                          | BAYAREALIKE   | -262.11        | 2                 | 0.1612             | 2.55E-01            | -                            | 528.27        | 1.12E-50        |
|                                                          | BAYAREALIKE+J | -164.90        | 3                 | 0.1195             | 1.32E-01            | 0.0076                       | 335.88        | 6.72E-09        |

## References for Supplementary Tables

- Bachmayer, F. & Szyndlar, Z. (1987) A second contribution to the ophidian fauna (Reptilia: Serpentes) of Kohfidisch, Austria. *Annalen des Naturhistorischen Museums in Wien*, 88, 25–39.
- Bailon, S. (1991) Amphibiens et reptiles du pliocène et du quaternaire de France et d'Espagne: mise en place et évolution des faunes. In: Université Paris, Paris.
- Bailon, S., Bover, P., Quintana, J. & Alcover, J.A. (2010) First fossil record of *Vipera Laurenti* 1768 “Oriental vipers complex”(Serpentes: Viperidae) from the Early Pliocene of the western Mediterranean islands. *Comptes Rendus Palevol*, 9, 147–154.
- Bailon, S., Garcia-Porta, J. & Quintana-Cardona, J. (2002) Première découverte de Viperidae (Reptilia, Serpentes) dans les îles Baléares (Espagne): des vipères du Néogène de Minorque. Description d’une nouvelle espèce du Pliocène. *Comptes Rendus Palevol*, 1, 227–234.
- Barlow, A., W. Grail, M. de Bruyn, and W. Wüster. 2012. Anonymous nuclear markers for the African adders (Serpentes: Viperidae: *Bitis*). *Conservation Genetics Resources* 4:967–969.
- Blain, H.-A., Bailon, S. & Agusti, J. (2007) Anurans and squamate reptiles from the latest early Pleistocene of Almenara-Casablanca-3 (Castellón, East of Spain). Systematic, climatic and environmental considerations. *Geodiversitas*, 29, 269–295.
- Blain, H.-A., Bailon, S. & Cuenca-Bescós, G. (2008) The Early-Middle Pleistocene palaeoenvironmental change based on the squamate reptile and amphibian proxies at the Gran Dolina site, Atapuerca, Spain. *Palaeogeography, Palaeoclimatology, Palaeoecology*, 261, 177–192.
- Blain, H.-A. & Villa, P. (2006) Amphibians and squamate reptiles from the early Upper Pleistocene of Bois Roche Cave (Charente, southwestern France). *Acta Zoologica Cracoviensia-Series A: Vertebrata*, 49, 1–32.
- Böhme, M. & Ilg, A. (2003) FosFARbase. Accessed June 2017, 2007.
- Burbrink, F. T., R. Lawson, and J. B. Slowinski. 2000. Mitochondrial DNA phylogeography of the polytypic North American rat snake (*Elaphe obsoleta*): a critique of the subspecies concept. *Evolution* 54:2107–2118.
- Delfino, M. & Bailon, S. (2000) Early Pleistocene herpetofauna from Cava dell'Erba and Cava Pirro (Apulia, southern Italy). *Herpetological Journal*, 10, 95–110.
- Delfino, M., Bailon, S. & Pitruzzella, G. (2011) The Late Pliocene amphibians and reptiles from “Capo Mannu D1 Local Fauna”(Mandriola, Sardinia, Italy). *Geodiversitas*, 33, 357–382.
- Geraads, D. (2006) The late Pliocene locality of Ah1 a1 Oughlam, Morocco: vertebrate fauna and interpretation. *Transactions of the Royal Society of South Africa*, 61, 97–101.
- Groombridge, B. (1986) Phyletic relationships among viperine snakes. In: Roček, Z. (Ed), *Studies in Herpetology*, Prague, pp. 219–222.
- Ivanov, M. (1998) The snake fauna of Devínska Nová Ves (Slovak Republic) in relation to the evolution of snake assemblages of the European Middle Miocene. *Acta Musei Moraviae, Scientiae Geologicae*, 53, 159–172.
- Ivanov, M. (2000) Snakes of the lower/middle Miocene transition at Vieux Collonges (Rhône, France), with comments on the colonisation of western Europe by colubroids. *Geodiversitas*, 22, 559–588.
- Ivanov, M. (2002) The oldest known Miocene snake fauna from Central Europe: Merkur-North locality, Czech Republic. *Acta Palaeontologica Polonica*, 47, 513–534.
- Ivanov, M. & Böhme, M. (2011) Snakes from Griesbeckerzell (Langhian, Early Badenian), North Alpine Foreland Basin (Germany), with comments on the evolution of snake faunas in Central Europe during the Miocene Climatic Optimum. *Geodiversitas*, 33, 411–449.
- Lawson, R., J. B. Slowinski, B. I. Crother, and F. T. Burbrink. 2005. Phylogeny of the Colubroidea (Serpentes): new evidence from mitochondrial and nuclear genes. *Mol. Phylogen. Evol.* 37:581–601.
- Rage, J.-C. (1973) Fossil snakes from Olduvai, Tanzania. *Fossil vertebrates of Africa*, 3, 1–6.
- Rage, J.-C. (2003) Squamate reptiles from the early Miocene of Arrisdrift (Namibia). *Geology and Palaeobiology of the central and southern Namib*, 2, 43–50.
- Rage, J.-C. & Bailon, S. (2005) Amphibians and squamate reptiles from the late early Miocene (MN 4) of Béon 1 (Montréal-du-Gers, southwestern France). *Geodiversitas*, 27, 413–441.

- Rage, J.-C. & Danilov, I.G. (2008) A new Miocene fauna of snakes from eastern Siberia, Russia: Was the snake fauna largely homogenous in Eurasia during the Miocene? *Comptes Rendus Palevol*, 7, 383–390.
- Rook, L., Delfino, M. & Sami, M. (2015) I vertebrati fossili della cava del Monticino di Brisighella: una finestra sui popolamenti continentali del Mediterraneo nel Miocene superiore. *Memorie dell'Istituto Italiano di Speleologia s. II*, 28, 79–100.
- Szyndlar, Z. (1987) Snakes from the lower Miocene locality of Dolnice (Czechoslovakia). *Journal of Vertebrate Paleontology*, 7, 55–71.
- Szyndlar, Z. (1991) A review of neogene and quaternary snakes of Central and Eastern Europe. Part 11: natricinae, elapidae, viperidae. *Estudios geológicos*, 47, 237–266.
- Szyndlar, Z. (2000) The snakes (Reptilia, Serpentes) of the Miocene of Portugal. *Ciencias da Terra*, 14, 359–364.
- Szyndlar, Z. (2009) Snake fauna (Reptilia: Serpentes) from the Early/Middle Miocene of Sandelzhausen and Rothenstein 13 (Germany). *Paläontologische Zeitschrift*, 83, 55–66.
- Szyndlar, Z. & Rage, J.-C. (2002) Fossil record of the true vipers. In: Schuett, G.W., Hoggren, M. & Douglas, M.E. (Eds), *Biology of the vipers*. Eagle Mountain Publishing, Eagle Mountain, pp. 419–444.
- Venczel, M. (1998) Late Miocene snakes (Reptilia: Serpentes) from Polgárdi (Hungary): a second contribution. *Acta Zoologica Cracoviensia*, 41, 1–22.
- Venczel, M. (2011) Middle-late Miocene snakes from the Pannonian Basin. *Acta Palaeontologica Romaniaae*, 7, 343–349.
- Venczel, M. & Stiuca, E. (2008) Late middle Miocene amphibians and squamate reptiles from Taut, Romania. *Geodiversitas*, 30, 731–763.
- Wüster, W., L. Peppin, C. E. Pook, and D. E. Walker. 2008. A nesting of vipers: phylogeny and historical biogeography of the Viperidae (Squamata: Serpentes). *Mol. Phylogen. Evol.* 49:445–459.
- Zerova, G. (1993) Late Cainozoic localities of snakes and lizards of Ukraine. *Revue de Paléobiologie*, 7, 273–280.
